# Supplementary material for: A novel ketone olefination via organozinc reagents in the presence of diphenyl phosphite
Source: Royal Society of Chemistry journal article supplement (doi:10.1039/c2ob06821d), 2012-01-01

## Supporting Information

### A Novel Ketone Olefination via Organozinc Reagents in the Presence of Diphenyl Phosphite

Hua Cui, Ying Li, and Songlin Zhang\*

*Key Laboratory of Organic Synthesis of Jiangsu Province, College of Chemistry, Chemical Engineering and Materials Science, Dushu Lake Campus, Suzhou University, Suzhou, 215123, People's Republic of China.*

*zhangsl@suda.edu.cn*

#### Table of Contents

|                                                                              |               |
|------------------------------------------------------------------------------|---------------|
| <b>Experimental Section</b>                                                  | <b>P2</b>     |
| <b>Characterization Data of Products</b>                                     | <b>P3–P8</b>  |
| <b><sup>1</sup>H NMR, and <sup>13</sup>C NMR of Products 3a–ac and 5a–kd</b> | <b>P8–P37</b> |

## Experimental Section

**General:** THF was distilled from sodium benzophenone under nitrogen. All reactions were conducted under a nitrogen atmosphere. Metallic zinc and all solvents were purchased from commercial source, without further purification before use. The flash column chromatography was carried out on Merck silica gel (300–400 mesh).  $^1\text{H}$  and  $^{13}\text{C}$  NMR spectra were recorded on a Varian Mercury 400 MHz spectrometer as solutions in  $\text{CDCl}_3$ . Chemical shifts in  $^1\text{H}$  NMR spectra are reported in parts per million (ppm,  $\delta$ ) downfield from the internal standard  $\text{Me}_4\text{Si}$  (TMS). Chemical shifts in  $^{13}\text{C}$  NMR spectra are reported relative to the central line of the chloroform signal ( $\delta = 77.50$  ppm). High-resolution mass spectra were obtained with a GCT-TOF instrument.

**Materials:** All chemicals were purchased from Aldrich, Alfa or Acros chemical company and used thus, without further purification. Petroleum ether (PE) used refers to the 60–90 °C boiling point fraction of petroleum.

**General procedure for the synthesis of organozinc reagent:** Alkyl bromide (128  $\mu\text{L}$ , 1.5 mmol) and zinc powder (0.1170 g, 1.8 mmol) in dry THF (3 mL) under a nitrogen atmosphere at room temperature. (for **4b** and **4c**, 5%  $\text{I}_2$  was added to trigger the reaction.) The mixture was stirred for about 15 min, and zinc powder disappeared. The stirring was continued to 0.5 h. **2d** and **2e** were prepared according to Knochel's method.<sup>1</sup> The concentration of organozinc reagents was determined by titration with  $\text{I}_2$ .<sup>2</sup>

**General procedure for the olefination reaction:** A solution of organozinc reagent in THF (1.5 mmol) was added to a solution of carbonyl compounds (0.5 mmol) in dry THF (3 mL) under a nitrogen atmosphere at room temperature. The mixture was stirred for about 30 min. Then diphenyl phosphite (0.6 mmol) was added (the reaction was monitored by TLC). The reaction mixture was stirred for 5h at 50 °C and then was quenched with dilute hydrochloric acid. The resulting mixture was extracted with diethyl ether (3×10 mL), and dried over anhydrous  $\text{Na}_2\text{SO}_4$ . The solvent was removed by evaporation under reduced pressure. Purification by column chromatography on silica gel afforded olefins (300–400 mesh, petroleum ether and ethyl acetate as eluent).

1 Krasovskiy, A.; Malakhov, V.; Gavryushin, A.; Knochel, P. *Angew. Chem., Int. Ed.* 2006, **45**, 6040.  
2 Ren, H.; Dunet, G.; Mayer, P.; Knochel, P. *J. Am. Chem. Soc.* 2007, **129**, 5376.

## Characterization Data of Compounds

**1,1-diphenylbuta-1,3-diene (3a)**<sup>12</sup> The title compound was obtained according to the general procedure. Colourless oil; Yield: 87%; IR (KBr): 3080, 3056, 3026, 1666, 1619, 1598, 1493, 1445, 905, 765, 699 cm<sup>-1</sup>; <sup>1</sup>H NMR (400 MHz, CDCl<sub>3</sub>): δ 7.38–7.16 (m, 10H), 6.71 (d, *J* = 11.0 Hz, 1H), 6.44 (td, *J* = 10.5 Hz, *J* = 16.9 Hz, 1H), 5.38 (d, *J* = 16.8 Hz, 1H), 5.11 (d, *J* = 10.1 Hz, 1H). <sup>13</sup>C NMR (CDCl<sub>3</sub>, 100 MHz): δ 143.64, 142.58, 140.14, 135.46, 130.93, 129.03, 128.71, 128.68, 128.10, 128.02, 127.90, 119.15. HRMS (EI<sup>+</sup>) calcd for C<sub>16</sub>H<sub>14</sub> (M<sup>+</sup>): 206.1096; found: 206.1096.

**1,1-bis(4-chlorophenyl)buta-1,3-diene (3b)**<sup>12</sup> The title compound was obtained according to the general procedure. Colourless oil; Yield: 85%; IR (KBr): 3033, 1668, 1590, 1488, 1401, 908, 765, 730 cm<sup>-1</sup>; <sup>1</sup>H NMR (400 MHz, CDCl<sub>3</sub>): δ 7.36 (d, *J* = 8.0 Hz, 2H), 7.24 (d, *J* = 8.3 Hz, 2H), 7.17 (d, *J* = 8.3 Hz, 2H), 7.12 (d, *J* = 8.0 Hz, 2H), 6.67 (d, *J* = 11.0 Hz, 1H), 6.38 (td, *J* = 10.5 Hz, *J* = 16.9 Hz, 1H), 5.42 (d, *J* = 16.7 Hz, 1H), 5.18 (d, *J* = 10.0 Hz, 1H). <sup>13</sup>C NMR (75 MHz, CDCl<sub>3</sub>): δ 141.06, 140.59, 137.99, 134.75, 134.02, 132.16, 129.74, 129.66, 129.22, 129.03, 128.91, 120.35. HRMS (EI<sup>+</sup>) calcd for C<sub>16</sub>H<sub>12</sub><sup>35</sup>Cl<sub>2</sub> (M<sup>+</sup>): 274.0316; found: 274.0316; HRMS(EI<sup>+</sup>) calcd for C<sub>16</sub>H<sub>12</sub><sup>37</sup>Cl<sub>2</sub> (M<sup>+</sup>): 276.0287; found: 276.0280.

**1,1-bis(4-methoxyphenyl)buta-1,3-diene (3c)**<sup>12</sup> The title compound was obtained according to the general procedure. Colourless oil; Yield: 92%; IR (KBr): 3035, 3002, 1659, 1605, 1505, 1463, 1287, 908, 831, 780 cm<sup>-1</sup>; <sup>1</sup>H NMR (400 MHz CDCl<sub>3</sub>): δ 7.21 (d, *J* = 8.6 Hz, 2H), 7.13 (d, *J* = 8.4, 2H), 6.91 (d, *J* = 8.4 Hz, 2H), 6.81 (d, *J* = 8.6 Hz, 2H), 6.59 (d, *J* = 11.0 Hz, 1H), 6.46 (td, *J* = 10.4 Hz, *J* = 16.7 Hz, 1H), 5.33 (d, *J* = 16.6 Hz, 1H), 5.07 (d, *J* = 9.9 Hz, 1H), 3.83 (s, 3H), 3.79 (s, 3H). <sup>13</sup>C NMR (CDCl<sub>3</sub>, 100 MHz): δ 159.51, 159.21, 142.72, 135.60, 135.42, 132.46, 131.95, 129.19, 127.04, 117.64, 113.87, 113.81, 55.59. HRMS (EI<sup>+</sup>) calcd for C<sub>18</sub>H<sub>18</sub>O<sub>2</sub> (M<sup>+</sup>): 266.1307; found: 266.1306.

**9-allylidene-9H-fluorene (3d)**<sup>18</sup> The title compound was obtained according to the general procedure. Yellow oil; Yield: 71%; IR (KBr): 3061, 1659, 1609, 1476, 1448, 938, 917, 760, 730 cm<sup>-1</sup>; <sup>1</sup>H NMR (300 MHz CDCl<sub>3</sub>): δ 7.94 (d, *J* = 7.4 Hz, 1H), 7.73–7.67 (m, 3H), 7.60–7.47 (m, 1H), 7.37–7.22 (m, 4H), 7.15 (d, *J* = 11.7 Hz, 1H), 5.68 (d, *J* = 16.5 Hz, 1H), 5.56 (d, *J* = 9.9 Hz, 1H). <sup>13</sup>C NMR (CDCl<sub>3</sub>, 75 MHz): δ 141.28, 139.68, 139.45, 137.39, 135.65, 133.09, 128.35, 128.28, 127.42, 127.25, 127.20, 125.45, 123.84, 120.43, 120.17, 119.87. HRMS (EI<sup>+</sup>) calcd for C<sub>16</sub>H<sub>12</sub> (M<sup>+</sup>): 204.0939; found: 204.0942.

**Tricyclo[3.3.1.1<sup>3,7</sup>]decane, 2-(2-propen-1-ylidene) (3e)**<sup>19</sup> The title compound was obtained according to the general procedure. Colourless oil; Yield: 85%; IR (KBr): 3042, 2908, 1674, 987, 968, 951, 890 cm<sup>-1</sup>; <sup>1</sup>H NMR (400 MHz, CDCl<sub>3</sub>): δ 6.63 (td, *J* = 10.6 Hz, *J* = 16.8 Hz, 1H), 5.78 (d, *J* = 11.0 Hz, 1H), 5.10 (d, *J* = 16.8 Hz, 1H), 4.93 (d, *J* = 9.1 Hz, 1H), 3.03 (s, 1H), 3.38 (s, 1H), 1.96–1.74 (m, 12H). <sup>13</sup>C NMR (CDCl<sub>3</sub>, 75 MHz): δ 152.70, 132.63, 118.25, 114.14, 40.89, 40.03, 39.19, 37.40, 33.04, 28.75. HRMS (EI<sup>+</sup>) calcd for C<sub>13</sub>H<sub>18</sub> (M<sup>+</sup>): 174.1409; found: 174.1410.

**1,2-dichloro-4-(1-phenylbuta-1,3-dienyl)benzene (3f)** The title compound was obtained according to the general procedure. Colourless oil;

Yield: 86%; Compound purity: 100% (confirmed by HPLC); IR (KBr): 3058, 1549, 1493, 1469, 1445, 945, 908, 765, 700  $\text{cm}^{-1}$ ;  $^1\text{H}$  NMR (300 MHz,  $\text{CDCl}_3$ ):  $\delta$  7.47–7.05(m, 8H), 6.70 (t,  $J = 10.7$  Hz, 1H), 6.47–6.32 (m, 1H), 5.44 (d,  $J = 16.8$  Hz, 1H), 5.20 (dd,  $J = 5.4$  Hz,  $J = 9.7$  Hz, 1H).  $^{13}\text{C}$  NMR ( $\text{CDCl}_3$ , 75 MHz):  $\delta$  142.44, 141.34, 141.04, 140.79, 139.92, 138.74, 134.70, 134.32, 132.68, 132.38, 131.81, 131.55, 130.49, 130.30, 130.10, 129.99, 129.77, 129.44, 128.65, 128.15, 128.09, 127.72, 127.03, 120.33, 120.27. HRMS ( $\text{EI}^+$ ) calcd for  $\text{C}_{16}\text{H}_{12}^{35}\text{Cl}_2$  ( $\text{M}^+$ ): 274.0316; found: 274.0316; HRMS ( $\text{EI}^+$ ) calcd for  $\text{C}_{16}\text{H}_{12}^{37}\text{Cl}_2$  ( $\text{M}^+$ ): 276.0287; found: 276.0280.

**1-methoxy-4-(1-phenylbuta-1,3-dienyl)benzene (3g)**<sup>20</sup> The title compound was obtained according to the general procedure. Colourless oil; Yield: 72%; IR (KBr): 3055, 1604, 1510, 1462, 1442, 1290, 966, 904, 832  $\text{cm}^{-1}$ ;  $^1\text{H}$  NMR (300 MHz,  $\text{CDCl}_3$ ):  $\delta$  7.40–7.13(m, 7H), 6.93–6.80(m, 2H), 6.65 (dd,  $J = 4.9$ ,  $J = 10.9$  Hz, 1H), 6.47–6.34 (m, 1H), 5.36 (dd,  $J = 9.0$  Hz,  $J = 16.4$  Hz, 1H), 5.10 (t,  $J = 11.9$  Hz, 1H), 3.84–3.79 (m, 3H).  $^{13}\text{C}$  NMR ( $\text{CDCl}_3$ , 75 MHz):  $\delta$  159.47, 159.19, 143.09, 142.94, 142.75, 140.11, 135.36, 134.94, 131.90, 130.63, 129.96, 128.98, 128.51, 128.37, 127.95, 127.71, 127.57, 127.18, 121.02, 120.93, 118.47, 117.92, 113.85, 133.78, 55.52, 55.50. HRMS ( $\text{EI}^+$ ) calcd for  $\text{C}_{17}\text{H}_{16}\text{O}$  ( $\text{M}^+$ ): 236.1201; found: 236.1201.

**1-methyl-3-(1-phenylbuta-1,3-dienyl)benzene (3h)**<sup>21</sup> The title compound was obtained according to the general procedure. Colourless oil; Yield: 88%; IR (KBr): 3055, 3025, 1666, 1601, 1492, 1445, 904, 787, 700  $\text{cm}^{-1}$ ;  $^1\text{H}$  NMR (400 MHz,  $\text{CDCl}_3$ ):  $\delta$  7.38–7.03(m, 9H), 6.70(d,  $J = 10.9$  Hz, 1H), 6.49–6.39 (m, 1H), 5.38(d,  $J = 16.8$  Hz, 1H), 5.12(d,  $J = 9.9$  Hz, 1H).  $^{13}\text{C}$  NMR ( $\text{CDCl}_3$ , 75 MHz):  $\delta$  143.72, 143.69, 142.58, 142.53, 140.17, 139.99, 138.19, 138.16, 135.52, 135.44, 131.38, 130.86, 128.87, 128.83, 128.78, 128.66, 128.62, 128.57, 128.53, 128.48, 128.02, 127.97, 127.90, 127.79, 125.32, 118.92, 118.89, 21.93, 21.90. HRMS ( $\text{EI}^+$ ) calcd for  $\text{C}_{17}\text{H}_{16}$  ( $\text{M}^+$ ): 220.1252; found: 220.1253.

**2-(1-phenylbuta-1,3-dienyl)thiophene (3i)** The title compound was obtained according to the general procedure. Colourless oil; Yield: 82%; Compound purity: 100% (confirmed by HPLC); IR (KBr): 3048, 1609, 1596, 1490, 1444, 860, 840, 770, 700  $\text{cm}^{-1}$ ;  $^1\text{H}$  NMR (300 MHz,  $\text{CDCl}_3$ ):  $\delta$  7.41–7.28(m, 5H), 7.18(d,  $J = 4.8$  Hz, 1H), 6.91–6.89 (m, 1H), 6.76–6.62(m, 2H), 6.30(td,  $J = 10.5$  Hz,  $J = 17.1$  Hz, 1H), 5.36(d,  $J = 16.9$  Hz, 1H), 5.08(d,  $J = 10.1$  Hz, 1H).  $^{13}\text{C}$  NMR ( $\text{CDCl}_3$ , 75 MHz):  $\delta$  147.08, 139.04, 137.49, 137.74, 130.43, 128.67, 128.22, 127.94, 127.54, 126.75, 125.26, 118.87. HRMS ( $\text{EI}^+$ ) calcd for  $\text{C}_{14}\text{H}_{12}\text{S}$  ( $\text{M}^+$ ): 212.0660, found: 212.0662.

**2-(1-phenylbuta-1,3-dienyl)naphthalene (3j)** The title compound was obtained according to the general procedure. White solid; Yield: 86%; Compound purity: 98% (confirmed by HPLC); IR (KBr): 3055, 1627, 1597, 1504, 1444, 899, 818, 763, 700  $\text{cm}^{-1}$ ;  $^1\text{H}$  NMR (300 MHz,  $\text{CDCl}_3$ ):  $\delta$  7.87–7.21(m, 12H), 6.83(dd,  $J = 11.0$  Hz,  $J = 17.4$  Hz, 1H), 6.55–6.43 (m, 1H), 5.43(d,  $J = 16.8$  Hz, 1H), 5.14(t,  $J = 8.8$  Hz, 1H).  $^{13}\text{C}$  NMR ( $\text{CDCl}_3$ , 75 MHz):  $\delta$  143.37, 143.32, 142.28, 139.88, 139.68, 137.37, 135.27, 133.57, 133.46, 133.08, 132.95, 130.77, 129.71, 129.30, 129.19, 128.72, 128.51, 128.30, 127.97, 127.85, 127.77, 127.27, 126.42, 126.37, 126.25, 125.63, 119.13, 119.05. HRMS ( $\text{EI}^+$ ) calcd for  $\text{C}_{20}\text{H}_{16}$  ( $\text{M}^+$ ): 256.1252, found: 256.1252.

**1-(penta-2,4-dien-2-yl)benzene (3ka), 1-(penta-1,4-dien-2-yl)benzene (3kb)**<sup>12</sup> The title compound was obtained according to the general procedure. Colourless solid; Yield: 82%; IR (KBr): 3081, 3057, 1599, 1494, 1445, 912, 863, 758, 698 cm<sup>-1</sup>; <sup>1</sup>H NMR (300 MHz, CDCl<sub>3</sub>): δ 7.46–7.21 (m, 5H), 5.90 (tdd, *J* = 6.6 Hz, *J* = 10.1 Hz, *J* = 16.7 Hz, 1H), 5.39 (s, 1H), 5.14–5.05 (m, 3H), 3.25 (d, *J* = 6.5 Hz, 2H). <sup>13</sup>C NMR (75 MHz, CDCl<sub>3</sub>): δ 146.77, 141.39, 136.66, 128.74, 127.92, 126.46, 116.95, 113.63, 39.97. HRMS (EI<sup>+</sup>): calcd. for C<sub>11</sub>H<sub>12</sub> (M<sup>+</sup>): 144.0939; found: 144.0938.

**(E)-1-bromo-4-(buta-1,3-dienyl)benzene (3l)**<sup>22</sup> The title compound was obtained according to the general procedure. Colourless oil; Yield: 31%; IR (KBr): 3051, 2962, 1638, 1501, 1407, 807, 680 cm<sup>-1</sup>; <sup>1</sup>H NMR (300 MHz, CDCl<sub>3</sub>): δ 7.42 (d, *J* = 8.3 Hz, 1H), 7.25 (d, *J* = 8.3 Hz, 1H), 6.75 (dd, *J* = 10.7 Hz, *J* = 15.1 Hz, 1H), 6.54–6.41 (m, 2H), 5.34 (d, *J* = 17.0 Hz, 1H), 5.20 (d, *J* = 10.5 Hz, 1H). <sup>13</sup>C NMR (75 MHz, CDCl<sub>3</sub>): δ 134.30, 133.49, 129.14, 128.95, 127.72, 125.21, 118.76, 115.80. HRMS (EI<sup>+</sup>): calcd for C<sub>11</sub>H<sub>10</sub>O<sub>2</sub> (M<sup>+</sup>): 207.9888; found: 208.9612.

**4-methyl-1,1-diphenylpenta-1,3-diene (3ab)**<sup>23</sup> The title compound was obtained according to the general procedure. Colourless oil; Yield: 41%; IR (KBr): 3045, 2973, 1614, 1505, 1463, 908, 835 cm<sup>-1</sup>; <sup>1</sup>H NMR (300 MHz, CDCl<sub>3</sub>): δ 7.38–7.26 (m, 10H), 6.87 (d, *J* = 11.2 Hz, 1H), 5.92 (d, *J* = 10.5 Hz, 1H), 1.89 (s, 3H), 1.76 (s, 3H). <sup>13</sup>C NMR (CDCl<sub>3</sub>, 75 MHz): δ 143.39, 140.49, 140.01, 137.95, 130.87, 130.43, 128.41, 127.72, 127.30, 127.19, 124.78, 123.49, 26.79, 18.92. HRMS (EI<sup>+</sup>) calcd for C<sub>18</sub>H<sub>18</sub> (M<sup>+</sup>): 234.1409; found: 234.1412.

**1,1-bis(4-chlorophenyl)buta-1,3-diene (3bb)** The title compound was obtained according to the general procedure. Colourless oil; Yield: 33%; Compound purity: 99% (confirmed by HPLC); IR (KBr): 3032, 1593, 1492, 1440, 915, 863, 765, 697 cm<sup>-1</sup>; <sup>1</sup>H NMR (300 MHz, CDCl<sub>3</sub>): δ 7.35 (d, *J* = 8.2 Hz, 2H), 7.24 (d, *J* = 8.8 Hz, 2H), 7.17–7.11 (m, 4H), 6.83 (d, *J* = 11.4 Hz, 1H), 5.85 (d, *J* = 11.4 Hz, 1H), 1.88 (s, 3H), 1.77 (s, 3H). <sup>13</sup>C NMR (CDCl<sub>3</sub>, 75 MHz): δ 141.36, 139.37, 138.38, 137.39, 133.34, 133.10, 132.09, 128.80, 128.71, 128.58, 125.51, 122.93, 26.76, 18.91. HRMS (EI<sup>+</sup>) calcd for C<sub>18</sub>H<sub>16</sub><sup>35</sup>Cl<sub>2</sub> (M<sup>+</sup>): 302.0629; found: 302.0630; HRMS (EI<sup>+</sup>) calcd for C<sub>18</sub>H<sub>16</sub><sup>37</sup>Cl<sub>2</sub> (M<sup>+</sup>): 304.0600; found: 304.0642.

**1,1-diphenylbut-1-en-3-yne (3ac)**<sup>24</sup> The title compound was obtained according to the general procedure. Colourless oil; Yield: 35%; IR (KBr): 3287, 3057, 3025, 1598, 1495, 1443, 849, 774, 763, 729, 697 cm<sup>-1</sup>; <sup>1</sup>H NMR (300 MHz CDCl<sub>3</sub>): δ 7.44–7.30 (m, 10H), 6.02 (s, 1H), 3.00 (s, 1H). <sup>13</sup>C NMR (CDCl<sub>3</sub>, 100 MHz): δ 154.72, 141.35, 139.10, 130.17, 128.78, 128.56, 128.22, 106.25, 82.69, 81.76. HRMS (EI<sup>+</sup>) calcd for C<sub>16</sub>H<sub>12</sub> (M<sup>+</sup>): 204.0939; found: 204.0938.

**Ethyl 3,3-diphenylacrylate (5a)**<sup>25</sup> The title compound was obtained according to the general procedure. Colourless oil; Yield: 89%; IR (KBr): 3057, 3026, 1723, 1617, 1575, 1492, 1445, 875, 771, 697 cm<sup>-1</sup>; <sup>1</sup>H NMR (400 MHz, CDCl<sub>3</sub>): δ 7.36–7.21 (m, 10H), 6.36 (s, 1H), 4.04 (q, *J* = 6.9 Hz, 2H), 1.10 (t, *J* = 7.0 Hz, 3H). <sup>13</sup>C NMR (CDCl<sub>3</sub>, 75 MHz): δ 166.36, 156.74, 141.05, 139.25, 129.64, 129.37, 128.62, 128.54, 128.35, 128.12,

117.73, 60.30, 14.26. HRMS (EI<sup>+</sup>) calcd for C<sub>17</sub>H<sub>16</sub>O<sub>2</sub> (M<sup>+</sup>): 252.1150; found: 252.1152.

**Ethyl 3,3-bis(4-chlorophenyl)acrylate (5b)**<sup>26</sup> The title compound was obtained according to the general procedure. Colourless oil; Yield: 80%; IR (KBr): 3025, 1721, 1619, 1589, 1491, 1402, 880, 830, 768 cm<sup>-1</sup>; <sup>1</sup>H NMR (300 MHz, CDCl<sub>3</sub>): δ 7.36 (d, *J* = 8.4 Hz, 2H), 7.30 (d, *J* = 8.6 Hz, 2H), 7.20 (d, *J* = 8.6 Hz, 2H), 7.13 (d, *J* = 8.4 Hz, 2H), 6.34 (s, 1H), 4.07 (q, *J* = 7.1 Hz, 2H), 1.15 (t, *J* = 7.1 Hz, 3H). <sup>13</sup>C NMR (CDCl<sub>3</sub>, 75 MHz): δ 165.85, 154.26, 139.08, 137.06, 136.00, 134.66, 130.79, 129.72, 128.96, 128.52, 118.38, 60.54, 14.26. HRMS (EI<sup>+</sup>) calcd for C<sub>17</sub>H<sub>14</sub><sup>35</sup>Cl<sub>2</sub>O<sub>2</sub> (M<sup>+</sup>): 320.0371; found: 320.0371; HRMS (EI<sup>+</sup>) calcd for C<sub>17</sub>H<sub>14</sub><sup>37</sup>Cl<sub>2</sub>O<sub>2</sub> (M<sup>+</sup>): 322.0341; found: 322.0350.

**Ethyl 3,3-diphenylacrylate (5c)**<sup>27</sup> The title compound was obtained according to the general procedure. Colourless oil; Yield: 82%; IR (KBr): 3039, 2969, 1688, 1592, 1495, 752, 691 cm<sup>-1</sup>; <sup>1</sup>H NMR (400 MHz, CDCl<sub>3</sub>): δ 7.24 (d, *J* = 8.0 Hz, 2H), 7.15 (d, *J* = 7.9 Hz, 2H), 6.91 (d, *J* = 7.8 Hz, 2H), 6.84 (d, *J* = 7.9 Hz, 2H), 6.23 (s, 1H), 4.07 (q, *J* = 6.9 Hz, 2H), 3.82 (d, *J* = 8.2 Hz, 6H), 1.16 (t, *J* = 6.7 Hz, 3H). <sup>13</sup>C NMR (CDCl<sub>3</sub>, 75 MHz): δ 161.39, 155.65, 154.57, 151.38, 128.73, 126.17, 125.79, 124.94, 109.79, 108.61, 108.12, 54.82, 50.29, 50.17, 9.12. HRMS (EI<sup>+</sup>) calcd for C<sub>19</sub>H<sub>20</sub>O<sub>4</sub> (M<sup>+</sup>): 312.1362; found: 312.1408.

**Ethyl 2-(9H-fluoren-9-ylidene)acetate (5d)**<sup>28</sup> The title compound was obtained according to the general procedure. Yellow solid; Yield: 65%; IR (KBr): 3062, 2980, 1713, 1600, 1450, 869, 780, 730 cm<sup>-1</sup>; <sup>1</sup>H NMR (300 MHz, CDCl<sub>3</sub>): δ 8.89 (d, *J* = 7.8 Hz, 1H), 7.62 (dd, *J* = 7.5 Hz, *J* = 15.5 Hz, 3H), 7.42–7.22 (m, 4H), 6.74 (s, 1H), 4.34 (q, *J* = 7.1 Hz, 2H), 1.39 (t, *J* = 7.1 Hz, 3H). <sup>13</sup>C NMR (CDCl<sub>3</sub>, 75 MHz): δ 166.52, 148.46, 142.71, 140.94, 139.05, 135.39, 131.07, 130.75, 129.41, 128.25, 127.66, 121.44, 119.97, 119.77, 114.14, 60.90, 14.58. HRMS (EI<sup>+</sup>) calcd for C<sub>17</sub>H<sub>14</sub>O<sub>2</sub> (M<sup>+</sup>): 250.0994; found: 250.0991.

**Ethyl 3-(4-methoxyphenyl)-3-phenylacrylate (5g)**<sup>29</sup> The title compound was obtained according to the general procedure. Colourless oil; Yield: 68%; IR (KBr): 3058, 2980, 1720, 1604, 1511, 1462, 1251, 874, 833, 774, 699 cm<sup>-1</sup>; <sup>1</sup>H NMR (300 MHz, CDCl<sub>3</sub>): δ 7.37–7.15 (m, 7H), 6.90 (d, *J* = 7.6 Hz, 1H), 6.83 (d, *J* = 7.8 Hz, 1H), 6.31 (s, 1H; E isomer), 6.27 (s, 1H; Z isomer), 4.06 (dq, *J* = 7.0 Hz, *J* = 14.2 Hz, 2H), 3.82 (d, *J* = 9.9 Hz, 3H), 1.17 (t, *J* = 7.1 Hz, 3H; Z isomer), 1.10 (t, *J* = 7.1 Hz, 3H; E isomer). <sup>13</sup>C NMR (CDCl<sub>3</sub>, 100 MHz): δ 166.50, 161.00, 159.98, 156.82, 156.52, 141.78, 139.51, 133.34, 131.26, 131.18, 129.99, 129.57, 129.32, 128.80, 128.54, 128.23, 128.08, 117.12, 115.60, 114.00, 113.46, 60.24, 60.12, 55.56, 55.45, 14.40, 14.28. HRMS (EI<sup>+</sup>) calcd for C<sub>18</sub>H<sub>18</sub>O<sub>3</sub> (M<sup>+</sup>): 282.1256; found: 282.1256.

**Ethyl 3-phenyl-3-m-tolylacrylate (5h)**<sup>30</sup> The title compound was obtained according to the general procedure. Colourless oil; Yield: 88%; IR (KBr): 3048, 2979, 1720, 1603, 1511, 1493, 1444, 833, 774, 699 cm<sup>-1</sup>; <sup>1</sup>H NMR (300 MHz, CDCl<sub>3</sub>): δ 7.37–7.00 (m, 9H), 6.35 (s, 1H), 4.05 (dq, *J* = 2.3 Hz, *J* = 7.0 Hz, 2H), 2.35–2.32 (m, 3H), 1.11 (t, *J* = 7.1 Hz, 3H). <sup>13</sup>C NMR (CDCl<sub>3</sub>, 100 MHz): δ 166.62, 157.19, 157.07, 141.37, 141.29, 139.56, 139.41, 138.45, 137.84, 130.66, 130.10, 129.78, 129.58, 129.31, 128.80, 128.75, 128.51, 128.29, 128.21, 126.75, 126.06, 117.85,

117.79, 60.46, 21.86, 14.47. HRMS (EI<sup>+</sup>) calcd for C<sub>18</sub>H<sub>18</sub>O<sub>2</sub> (M<sup>+</sup>): 266.1307; found: 266.1305.

**(E)-ethyl 3-phenylbut-2-enoate (5ka)**<sup>31</sup> The title compound was obtained according to the general procedure. Colourless oil; Yield: 32%; IR (KBr): 3024, 1714, 1629, 1446, 1273, 873, 767, 694 cm<sup>-1</sup>; <sup>1</sup>H NMR (300 MHz, CDCl<sub>3</sub>): δ 7.49–7.26 (m, 5H), 6.13 (s, 1H), 4.22 (q, *J* = 7.1 Hz, 2H), 2.58 (s, 3H), 1.32 (t, *J* = 7.1 Hz, 3H). <sup>13</sup>C NMR (CDCl<sub>3</sub>, 75 MHz): δ 167.21, 155.74, 142.46, 129.19, 128.71, 126.52, 117.40, 60.08, 18.18, 14.58. HRMS (EI<sup>+</sup>) calcd for C<sub>12</sub>H<sub>14</sub>O<sub>2</sub> (M<sup>+</sup>): 190.0994; found: 190.0993.

**Ethyl 3-phenylbut-3-enoate (5kb)**<sup>31</sup> The title compound was obtained according to the general procedure. Colourless oil; Yield: 44%; IR (KBr): 3085, 1734, 1627, 1495, 1445, 906, 860, 776, 733, 701 cm<sup>-1</sup>; <sup>1</sup>H NMR (300 MHz, CDCl<sub>3</sub>): δ 7.44–7.25 (m, 5H), 5.54 (s, 1H), 5.23 (s, 1H), 4.11 (q, *J* = 7.1 Hz, 2H), 3.51 (s, 2H), 1.18 (t, *J* = 7.0 Hz, 3H). <sup>13</sup>C NMR (CDCl<sub>3</sub>, 100 MHz): δ 171.77, 141.42, 140.26, 128.80, 128.19, 126.24, 116.60, 61.21, 41.77, 14.52. HRMS (EI<sup>+</sup>) calcd for C<sub>12</sub>H<sub>14</sub>O<sub>2</sub> (M<sup>+</sup>): 190.0994; found: 190.0995.

**(E)-ethyl 3-(benzo[d][1,3]dioxol-5-yl)acrylate (5n)**<sup>32</sup> The title compound was obtained according to the general procedure. White solid; Yield: 67%; IR (KBr): 3062, 2980, 1709, 1604, 1503, 1447, 1250, 980, 931, 853, 810 cm<sup>-1</sup>; <sup>1</sup>H NMR (300 MHz, CDCl<sub>3</sub>): δ 7.59 (d, *J* = 15.9 Hz, 1H), 7.03–6.79 (m, 2H), 6.80 (d, *J* = 7.9 Hz, 1H), 6.26 (d, *J* = 15.9 Hz, 1H), 6.00 (s, 2H), 4.25 (q, *J* = 7.1 Hz, 2H), 1.33 (t, *J* = 7.1 Hz, 3H). <sup>13</sup>C NMR (CDCl<sub>3</sub>, 75 MHz): δ 167.39, 149.76, 148.54, 144.49, 129.11, 124.59, 116.42, 108.74, 106.69, 101.76, 60.61, 14.56. HRMS (EI<sup>+</sup>) calcd for C<sub>12</sub>H<sub>12</sub>O<sub>4</sub> (M<sup>+</sup>): 220.0736; found: 220.0740.

**Ethyl 2,2-dimethyl-3-phenylbut-3-enoate (5kc)**<sup>33</sup> The title compound was obtained according to the general procedure. Colourless oil; Yield: 73%; IR (KBr): 3083, 3056, 1731, 1626, 1493, 1444, 1255, 909, 776, 703 cm<sup>-1</sup>; <sup>1</sup>H NMR (300 MHz, CDCl<sub>3</sub>): δ 7.27–7.15 (m, 5H), 5.32 (s, 1H), 5.15 (s, 1H), 4.10 (q, *J* = 7.1 Hz, 2H), 1.39 (s, 6H), 1.17 (t, *J* = 7.1 Hz, 3H). <sup>13</sup>C NMR (CDCl<sub>3</sub>, 75 MHz): δ 176.69, 153.44, 142.02, 128.18, 128.04, 127.27, 114.66, 60.78, 47.80, 26.14, 14.21. HRMS (EI<sup>+</sup>) calcd for C<sub>14</sub>H<sub>18</sub>O<sub>2</sub> (M<sup>+</sup>): 218.1307; found: 218.1315.

**Ethyl 3-(4-chlorophenyl)-2,2-dimethylbut-3-enoate (5p)** The title compound was obtained according to the general procedure. Colourless oil; Yield: 61%; Compound purity: 100% (confirmed by HPLC); IR (KBr): 3024, 2980, 1729, 1630, 1489, 1399, 1253, 908, 835 cm<sup>-1</sup>; <sup>1</sup>H NMR (300 MHz, CDCl<sub>3</sub>): δ 7.24 (d, *J* = 8.5 Hz, 2H), 7.09 (d, *J* = 8.5 Hz, 2H), 5.33 (s, 1H), 5.14 (s, 1H), 4.10 (q, *J* = 7.1 Hz, 2H), 1.38 (s, 6H), 1.18 (t, *J* = 7.0 Hz, 3H). <sup>13</sup>C NMR (CDCl<sub>3</sub>, 75 MHz): δ 176.42, 152.30, 140.43, 133.21, 129.56, 128.19, 115.29, 61.07, 47.71, 26.03, 14.22. HRMS (EI<sup>+</sup>) calcd for C<sub>14</sub>H<sub>17</sub><sup>35</sup>ClO<sub>2</sub> (M<sup>+</sup>): 252.0917; found: 252.0916; HRMS (EI<sup>+</sup>) calcd for C<sub>14</sub>H<sub>17</sub><sup>37</sup>ClO<sub>2</sub> (M<sup>+</sup>): 254.0888; found: 254.0888.

**Ethyl 3-(4-methoxyphenyl)-2,2-dimethylbut-3-enoate (5q)** The title compound was obtained according to the general procedure. Colourless oil; Yield: 82%; Compound purity: 99% (confirmed by HPLC); IR (KBr): 3024, 1729, 1609, 1511, 1464, 1247, 909, 836 cm<sup>-1</sup>; <sup>1</sup>H NMR (300 MHz,

CDCl<sub>3</sub>): δ 7.09 (d, *J* = 8.5 Hz, 2H), 6.81 (d, *J* = 8.5 Hz, 2H), 5.27 (s, 1H), 5.12 (s, 1H), 4.11 (q, *J* = 7.1 Hz, 2H), 3.79 (s, 3H), 1.38 (s, 6H), 1.18 (t, *J* = 7.0 Hz, 3H). <sup>13</sup>C NMR (CDCl<sub>3</sub>, 75 MHz): δ 176.79, 158.88, 152.88, 134.38, 129.22, 114.05, 113.39, 60.91, 55.37, 47.84, 26.12, 14.23. HRMS (EI<sup>+</sup>) calcd for C<sub>16</sub>H<sub>20</sub>O<sub>3</sub> (M<sup>+</sup>): 248.1412; found: 248.1414.

**Ethyl 2-(3H-inden-1-yl)-2-methylpropanoate (5r)** The title compound was obtained according to the general procedure. Colourless oil; Yield: 87%; Compound purity: 98% (confirmed by HPLC); IR (KBr): 3073, 2975, 1736, 1636, 1399, 907, 776, 699 cm<sup>-1</sup>; <sup>1</sup>H NMR (300 MHz, CDCl<sub>3</sub>): δ 7.45 (d, *J* = 7.1 Hz, 1H), 7.32 (d, *J* = 7.3 Hz, 1H), 7.25–7.15 (m, 2H), 6.36 (s, 1H), 4.11 (q, *J* = 7.1 Hz, 2H), 3.35 (s, 2H), 1.59 (s, 6H), 1.13 (t, *J* = 7.0 Hz, 3H). <sup>13</sup>C NMR (CDCl<sub>3</sub>, 100 MHz): δ 177.08, 148.21, 145.24, 143.74, 127.98, 126.29, 124.86, 124.34, 120.88, 61.30, 43.87, 37.76, 25.76, 14.54. HRMS (EI<sup>+</sup>) calcd for C<sub>15</sub>H<sub>18</sub>O<sub>2</sub> (M<sup>+</sup>): 230.1307; found: 230.1308.

**Ethyl 2-methyl-3-phenylbut-3-enoate (5kd)**<sup>34</sup> The title compound was obtained according to the general procedure. Colourless oil; Yield: 45%; IR (KBr): 3073, 2977, 1733, 1628, 1503, 1446, 767, 701 cm<sup>-1</sup>; <sup>1</sup>H NMR 300 MHz, CDCl<sub>3</sub>): δ 7.40–7.25 (m, 5H), 5.39 (s, 1H), 5.23 (s, 1H), 4.10 (q, *J* = 7.1 Hz, 2H), 3.67 (q, *J* = 7.1 Hz, 1H), 1.39 (d, *J* = 7.08 Hz, 3H), 1.15 (t, *J* = 7.1 Hz, 3H). <sup>13</sup>C NMR (CDCl<sub>3</sub>, 75 MHz): δ 174.66, 148.29, 141.29, 128.51, 127.82, 126.70, 114.11, 60.87, 44.77, 17.22, 14.26. HRMS (EI<sup>+</sup>) calcd for C<sub>13</sub>H<sub>16</sub>O<sub>2</sub> (M<sup>+</sup>): 204.1150; found: 204.1151.



3a

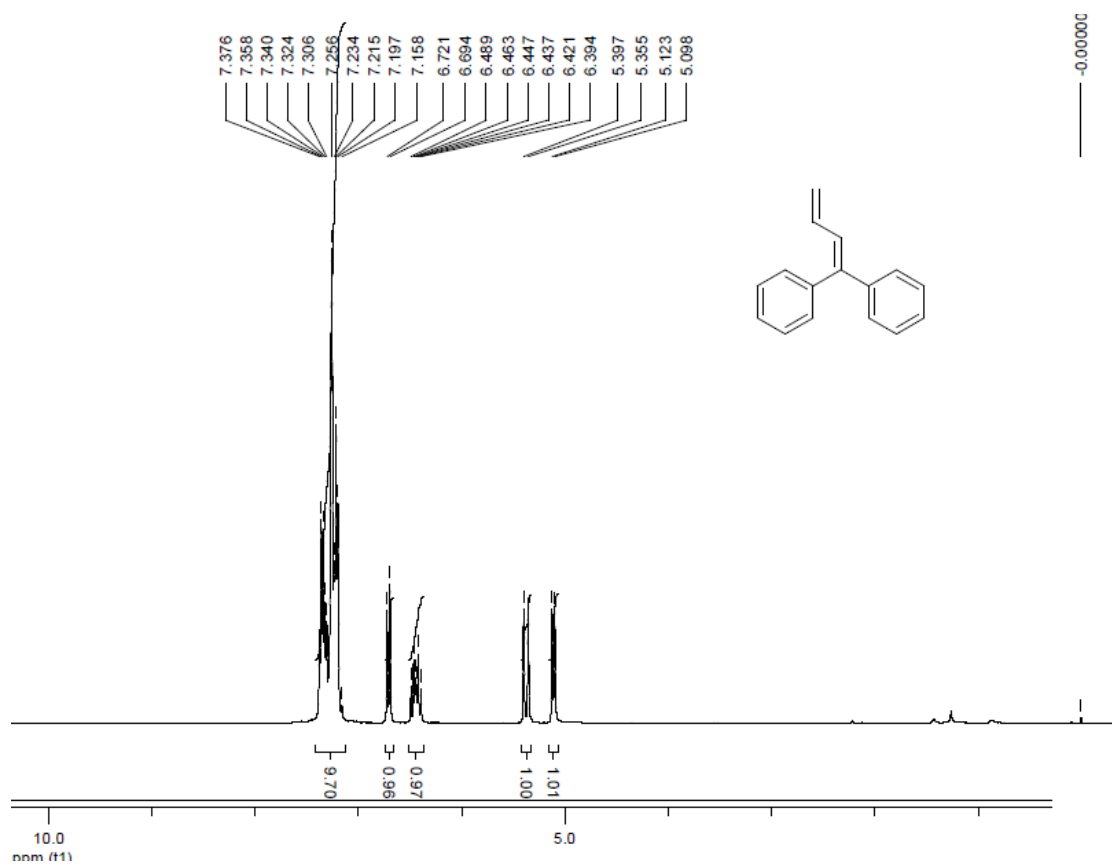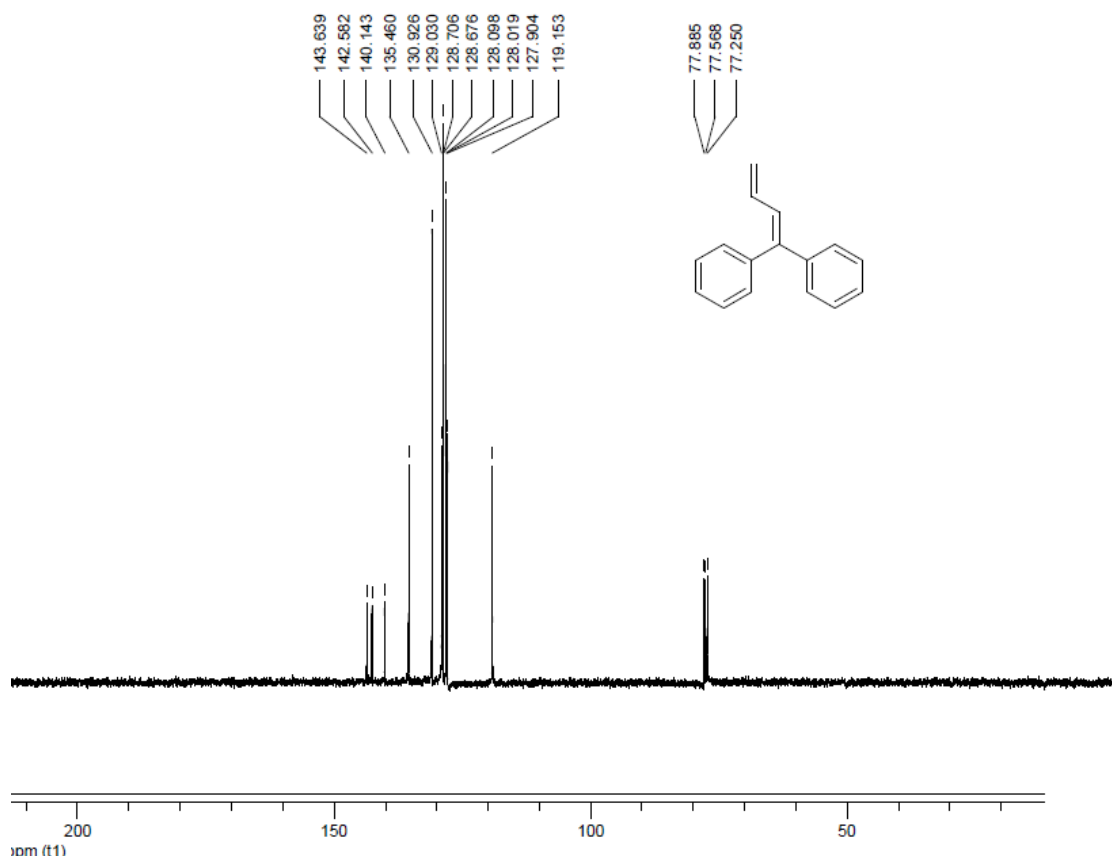

3b

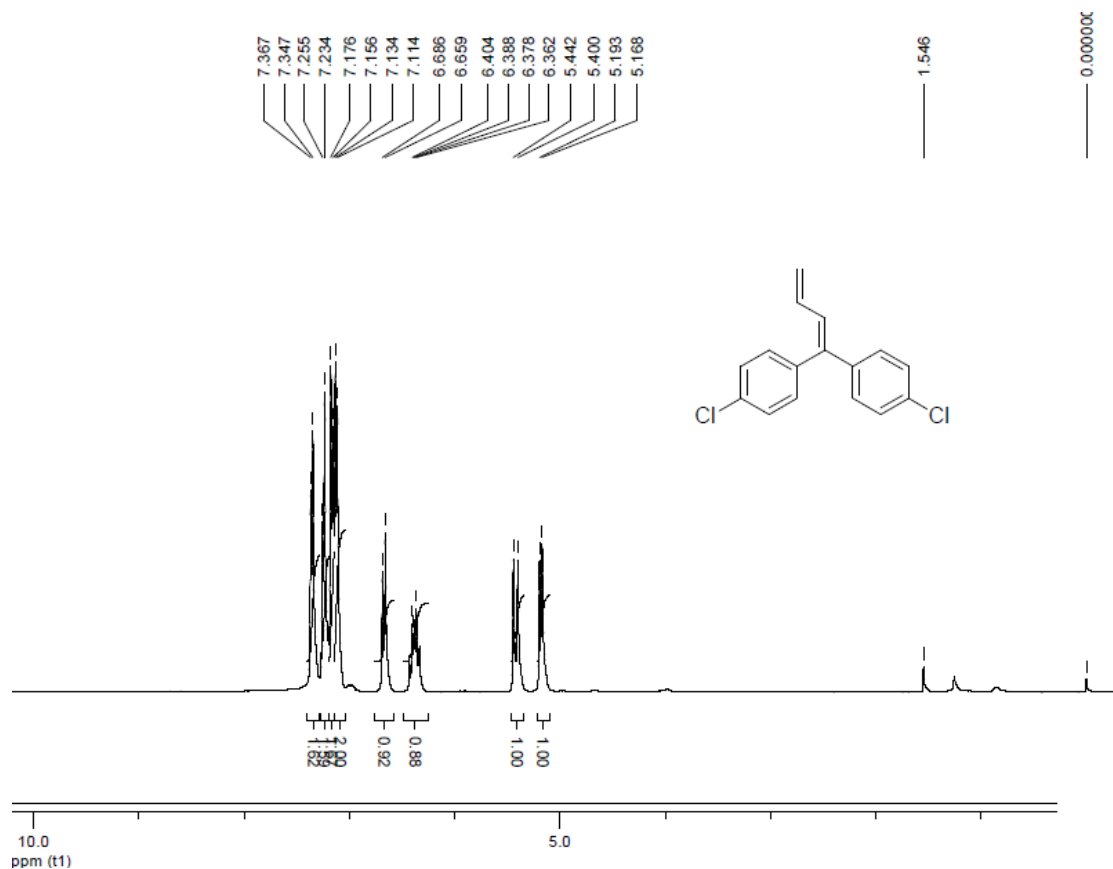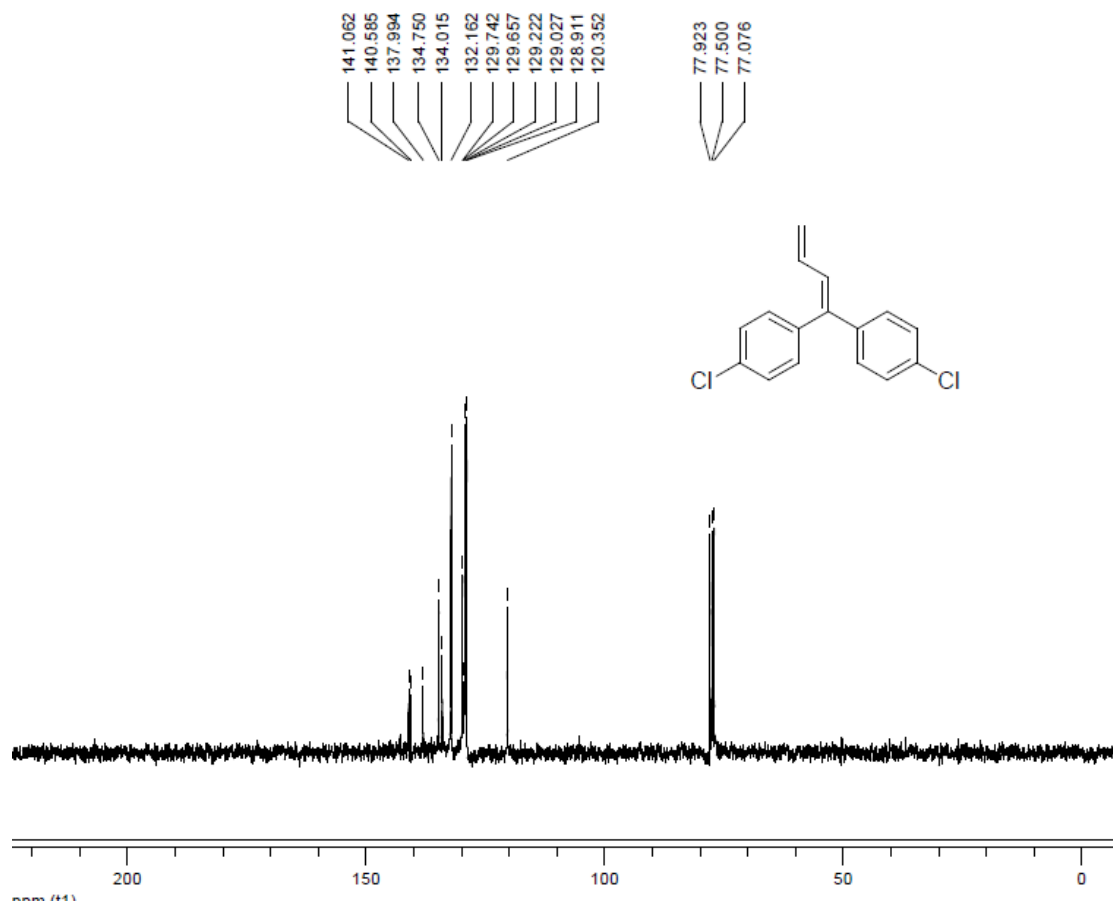

3c

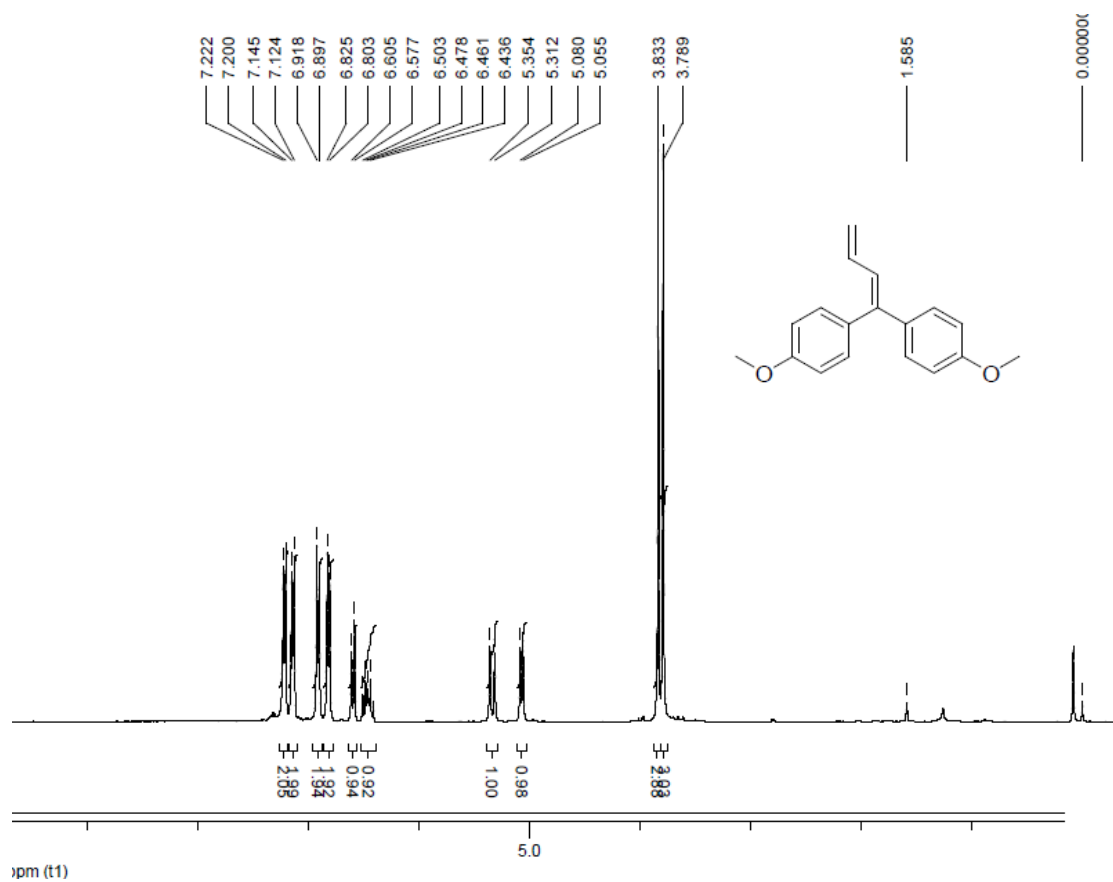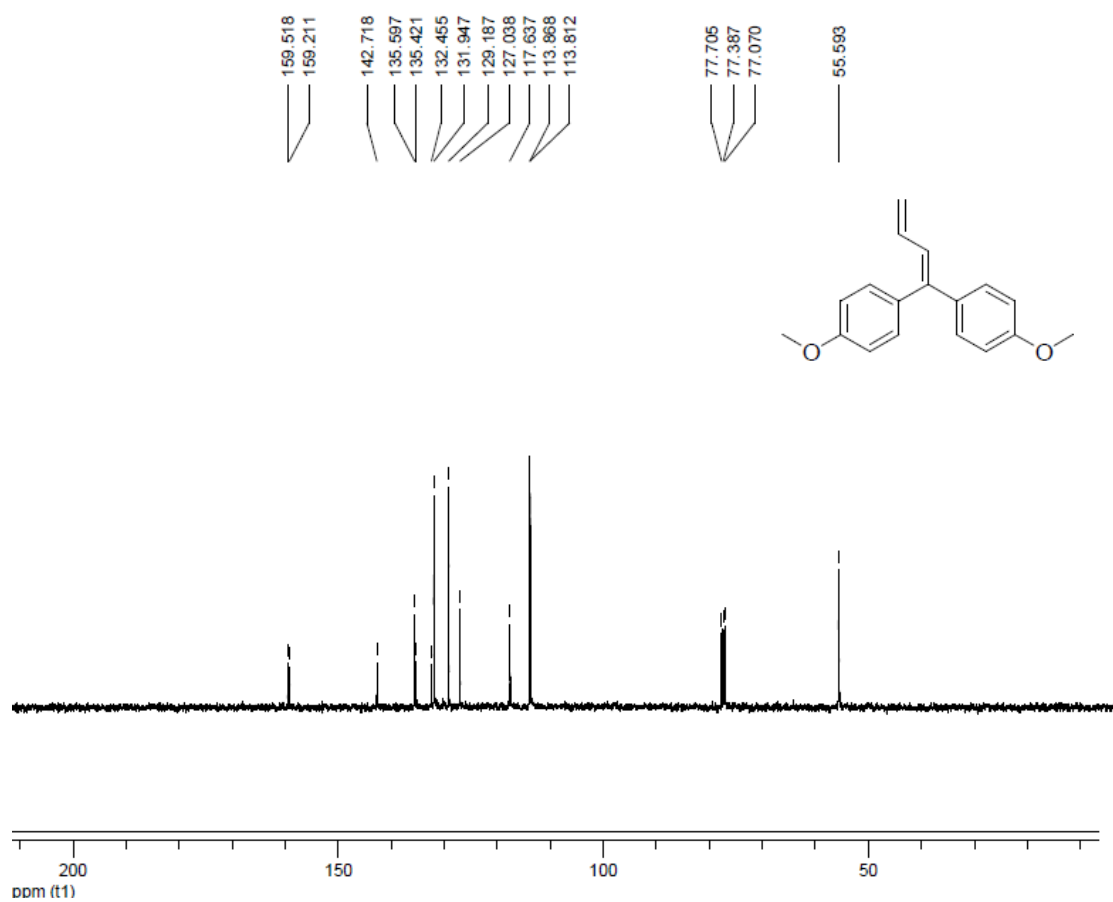

3d

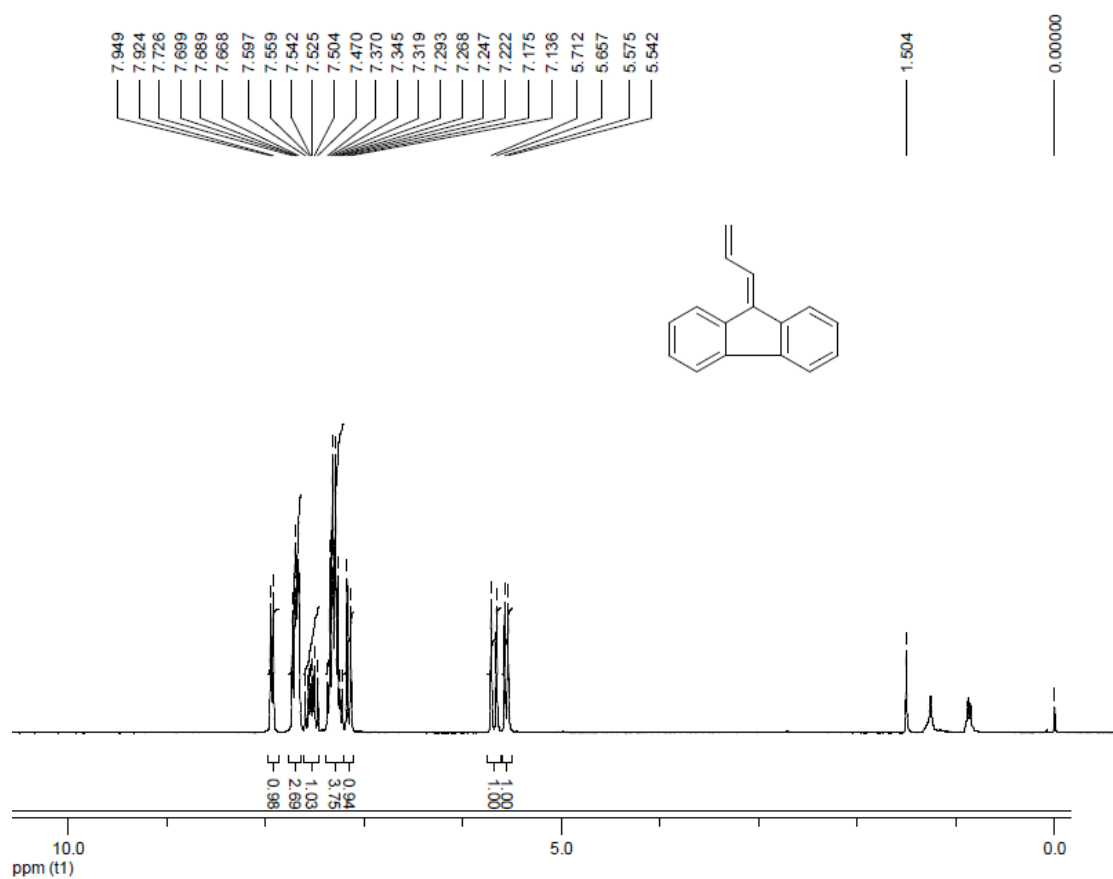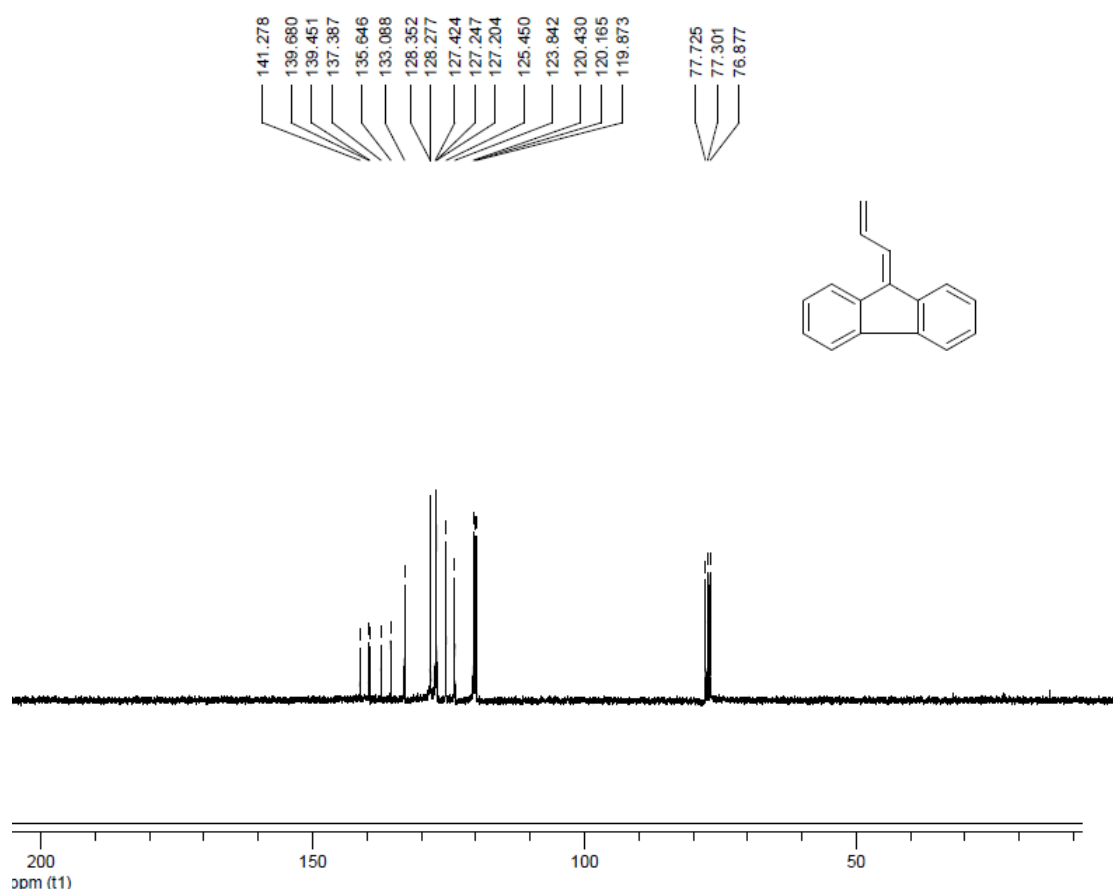

3e

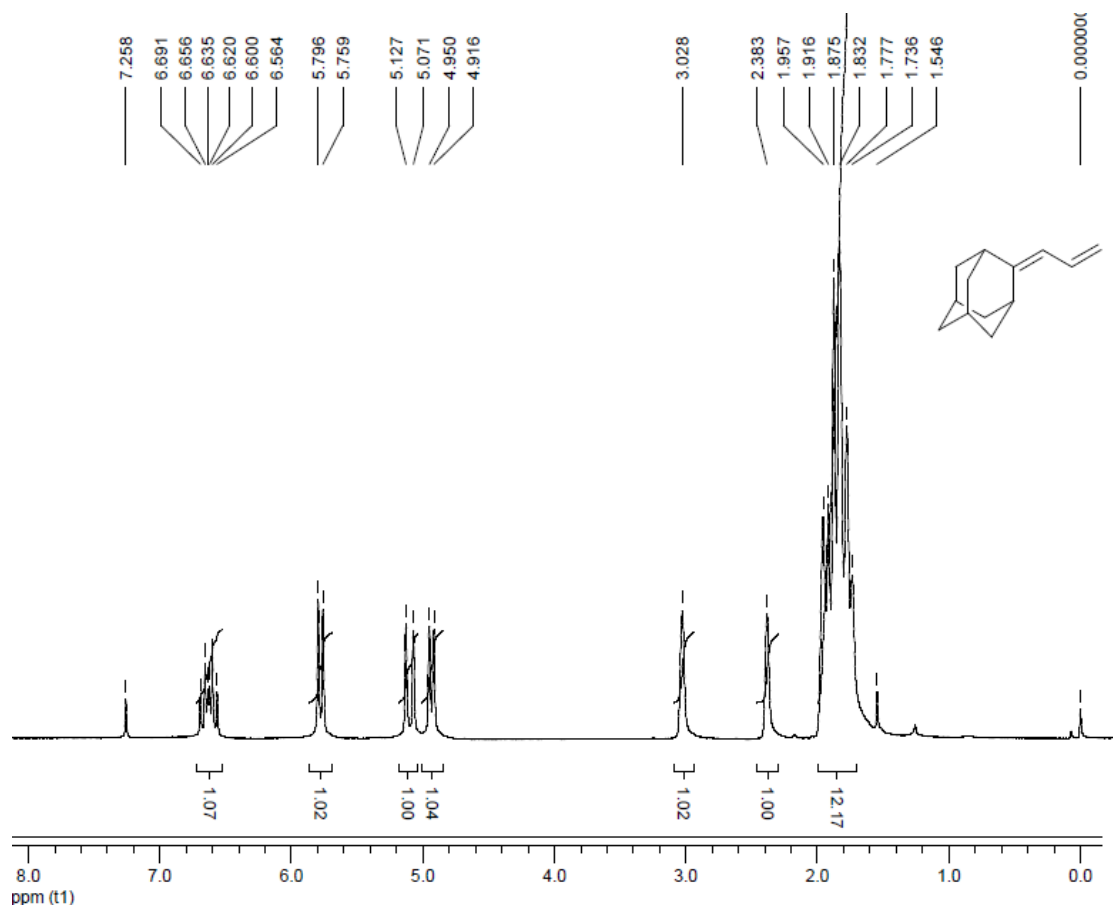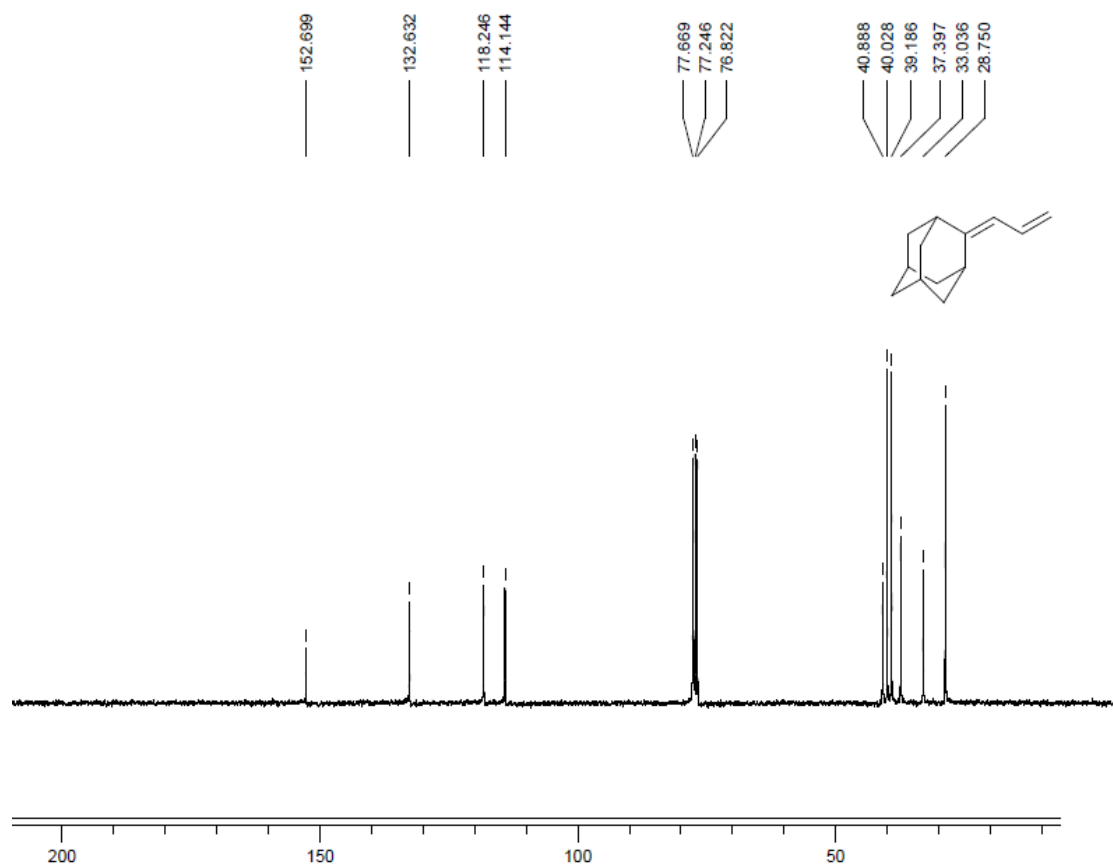

3f

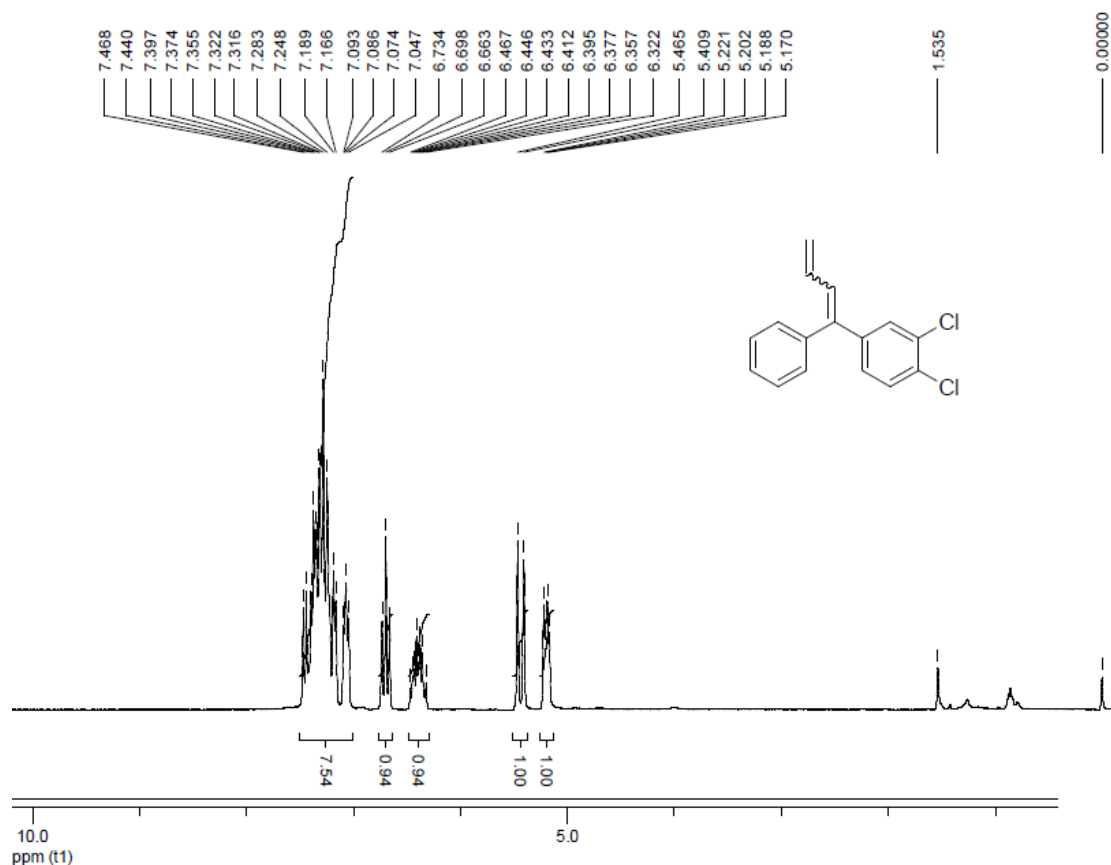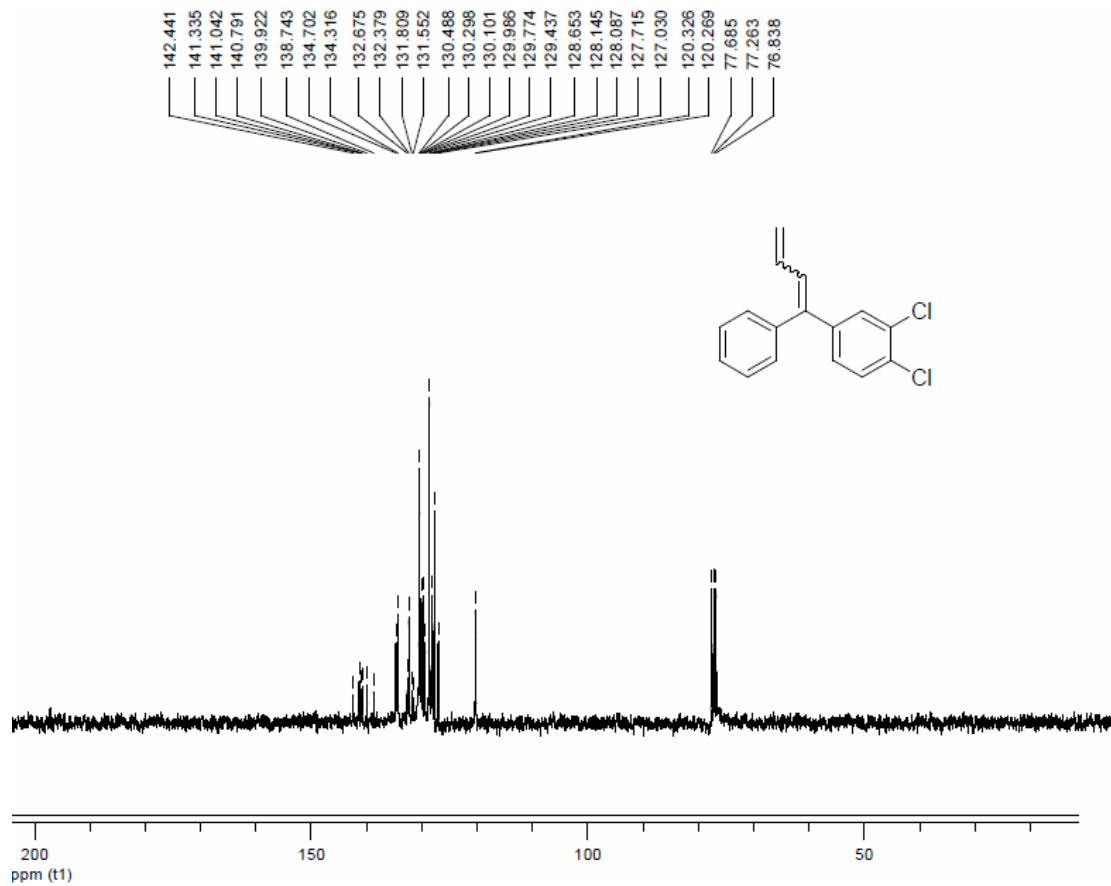

3g

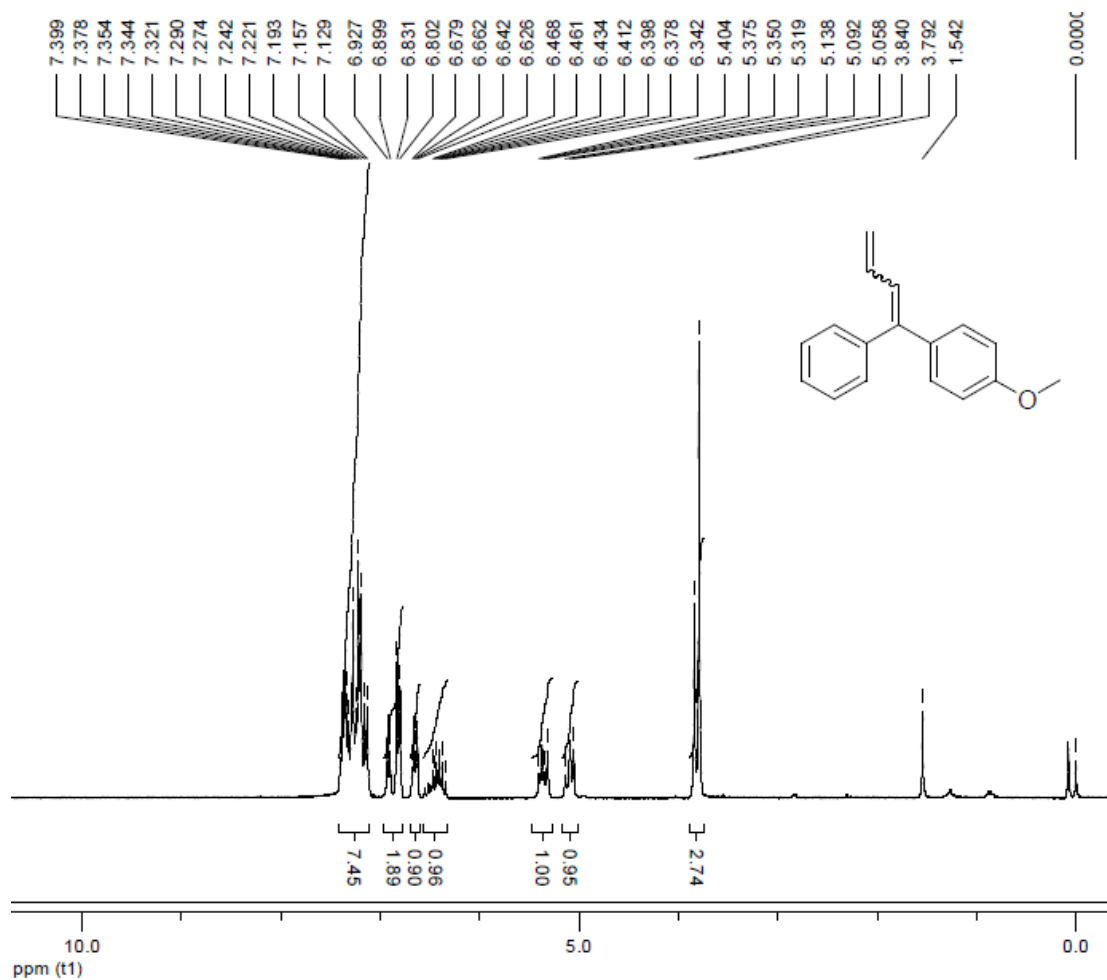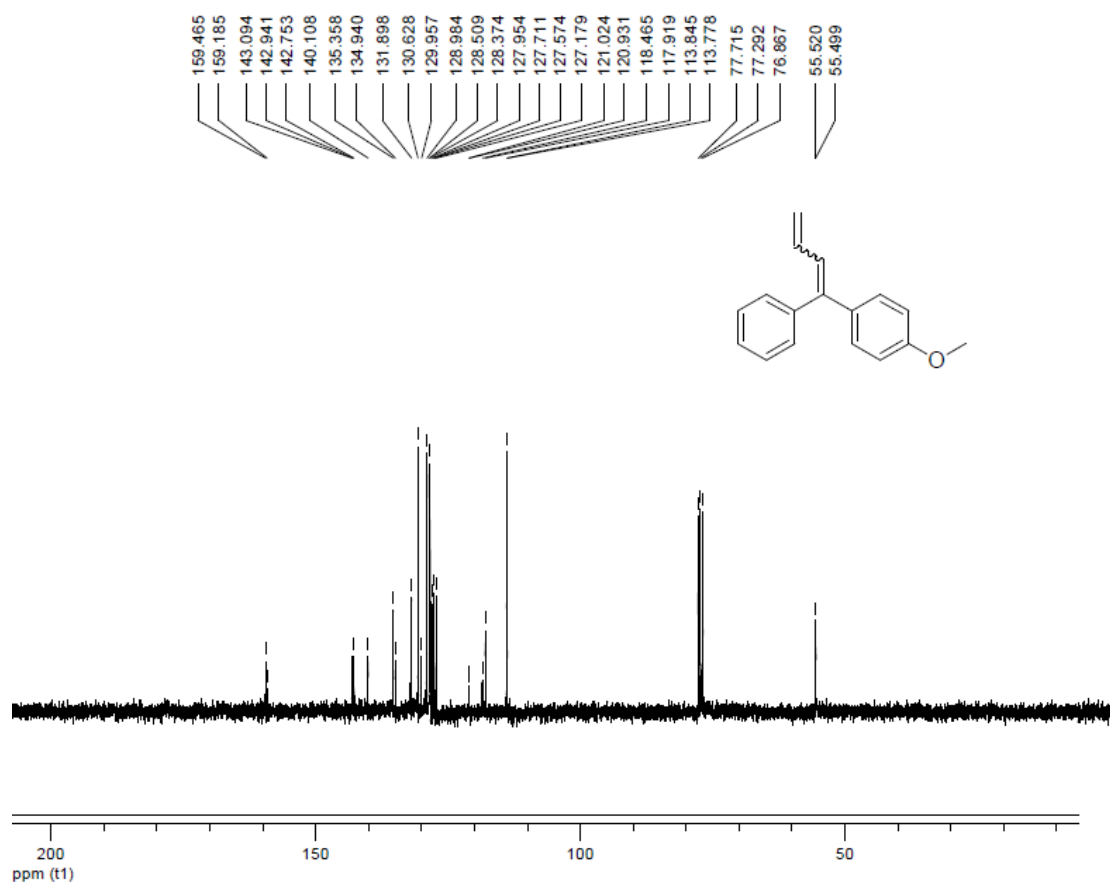

3h

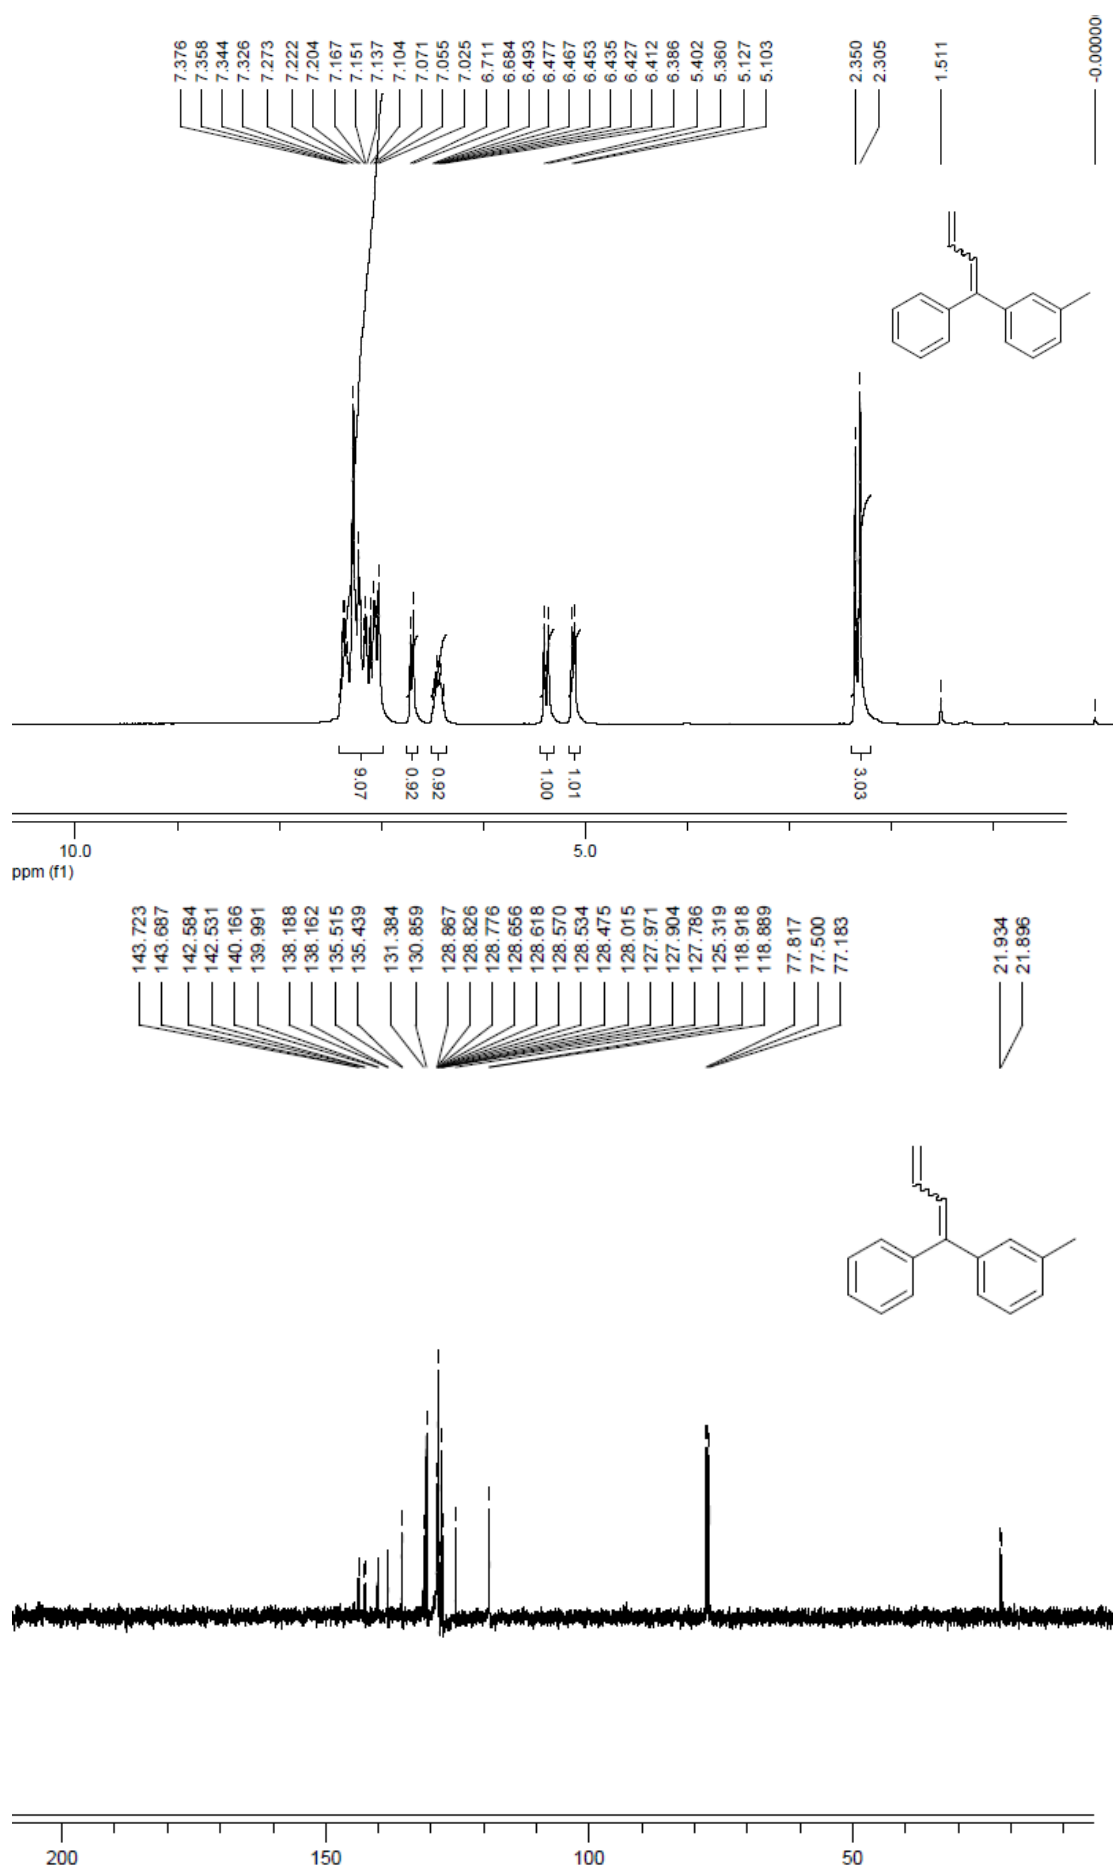



3i

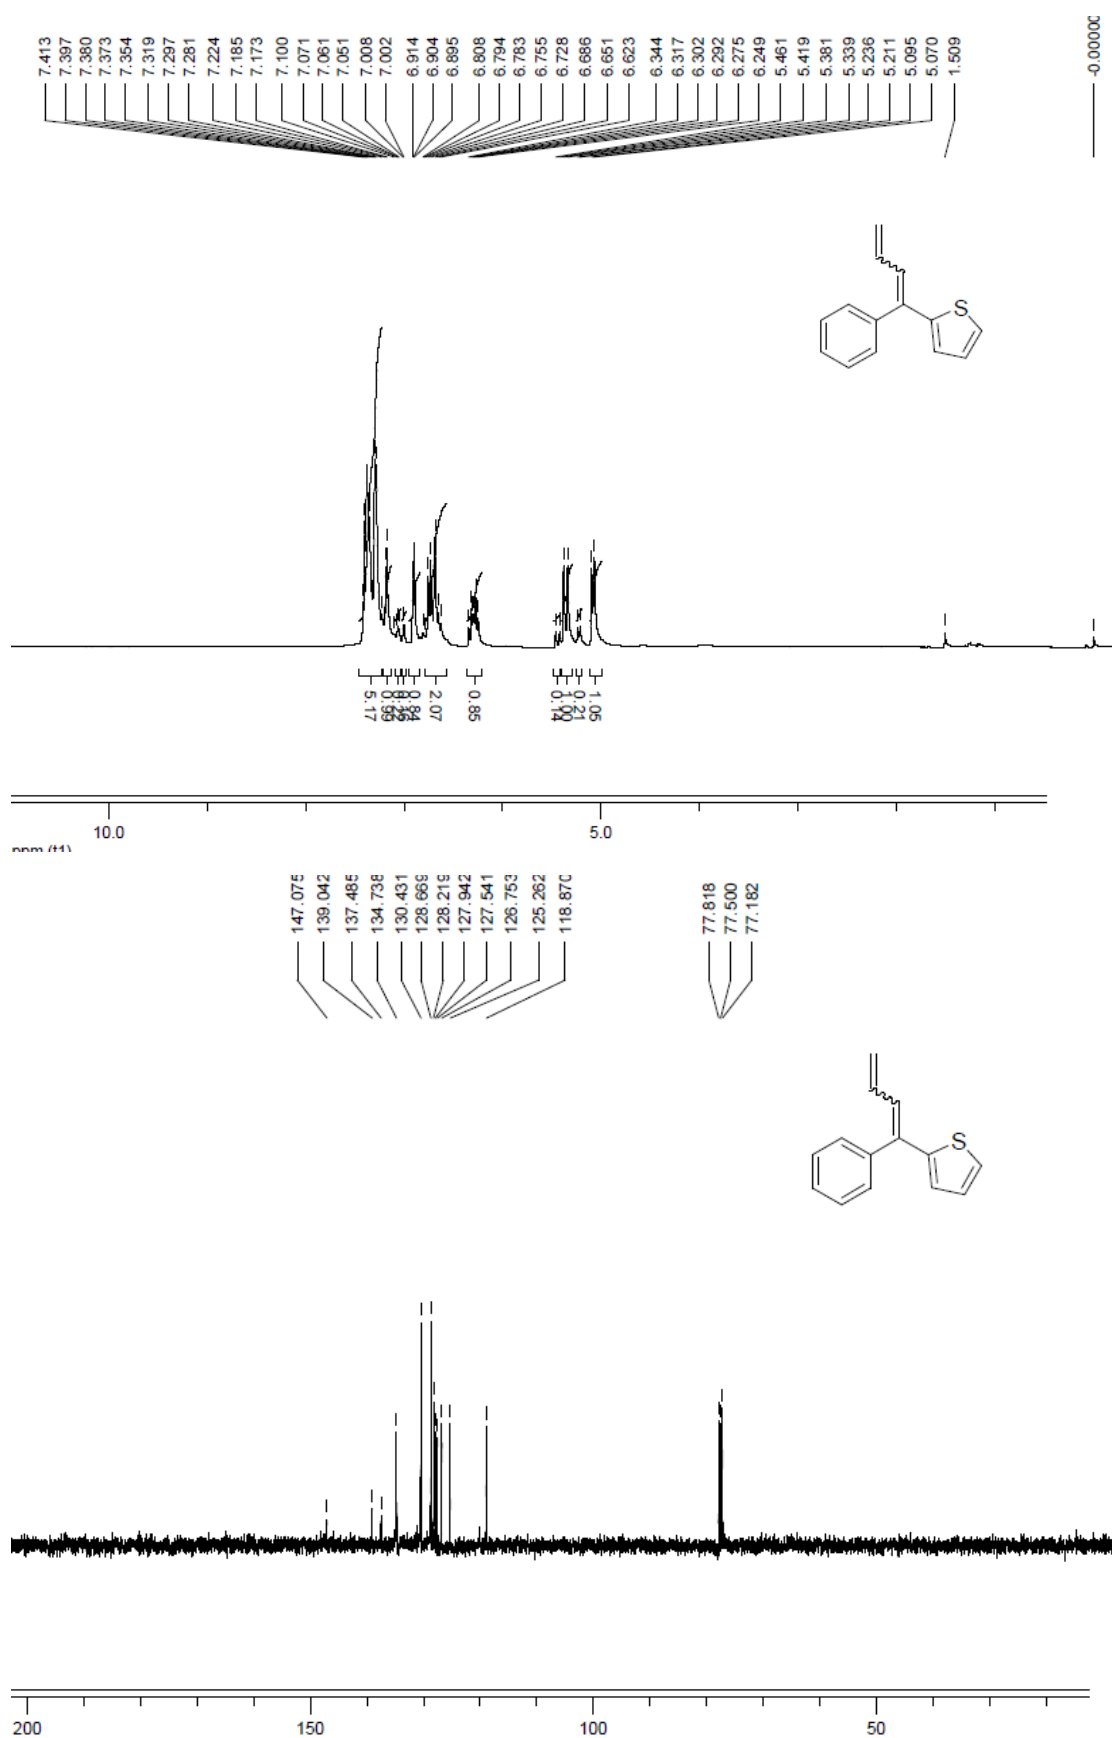

3j

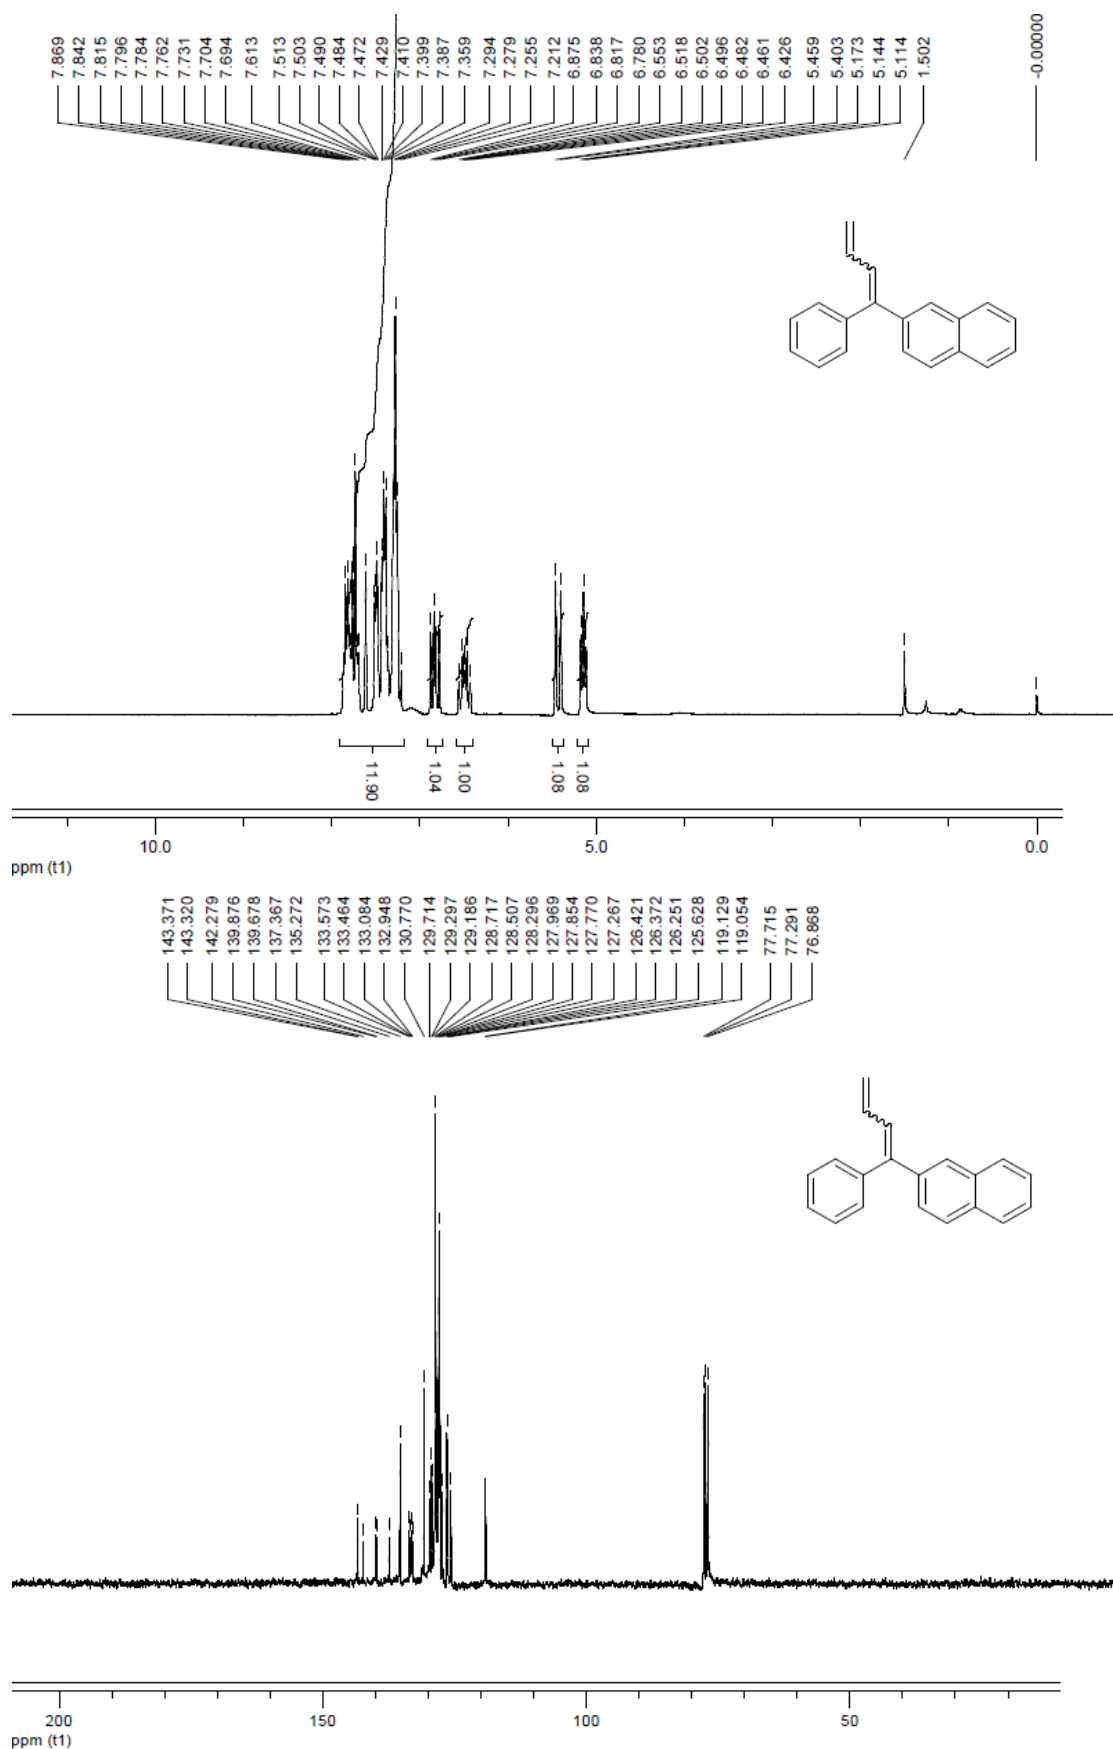

3ka, 3kb

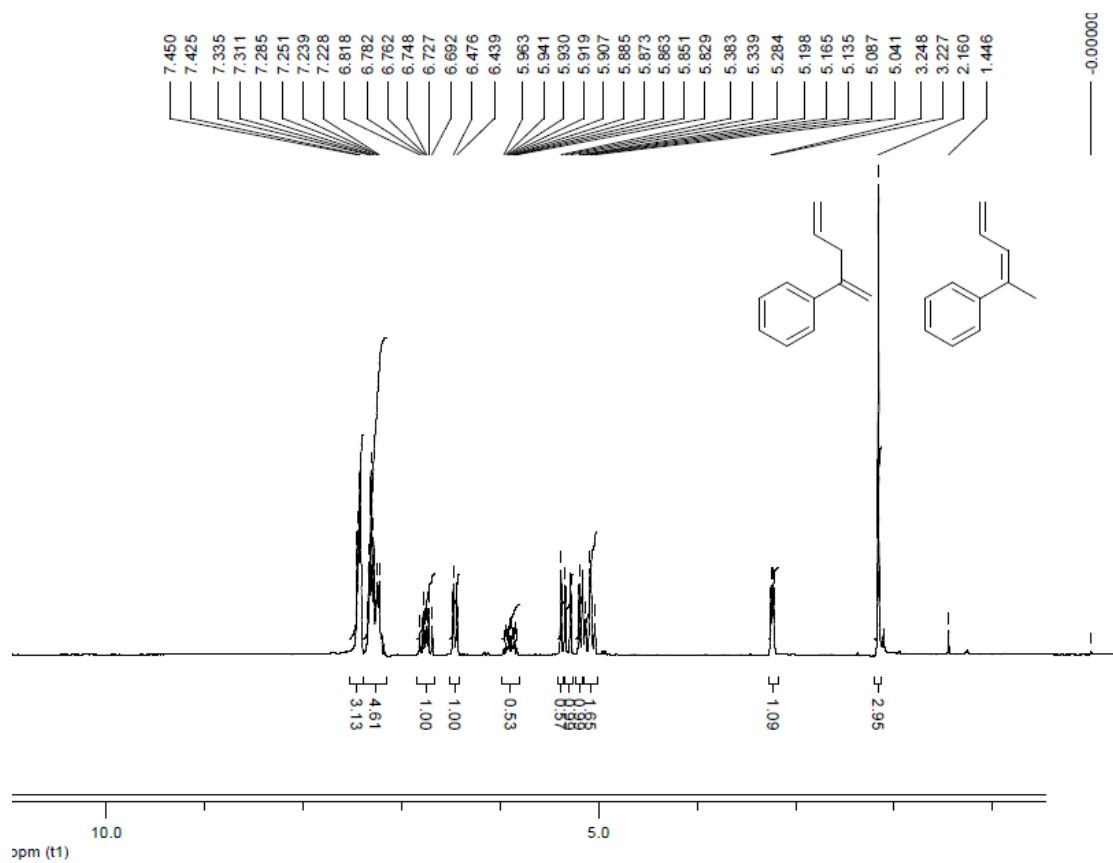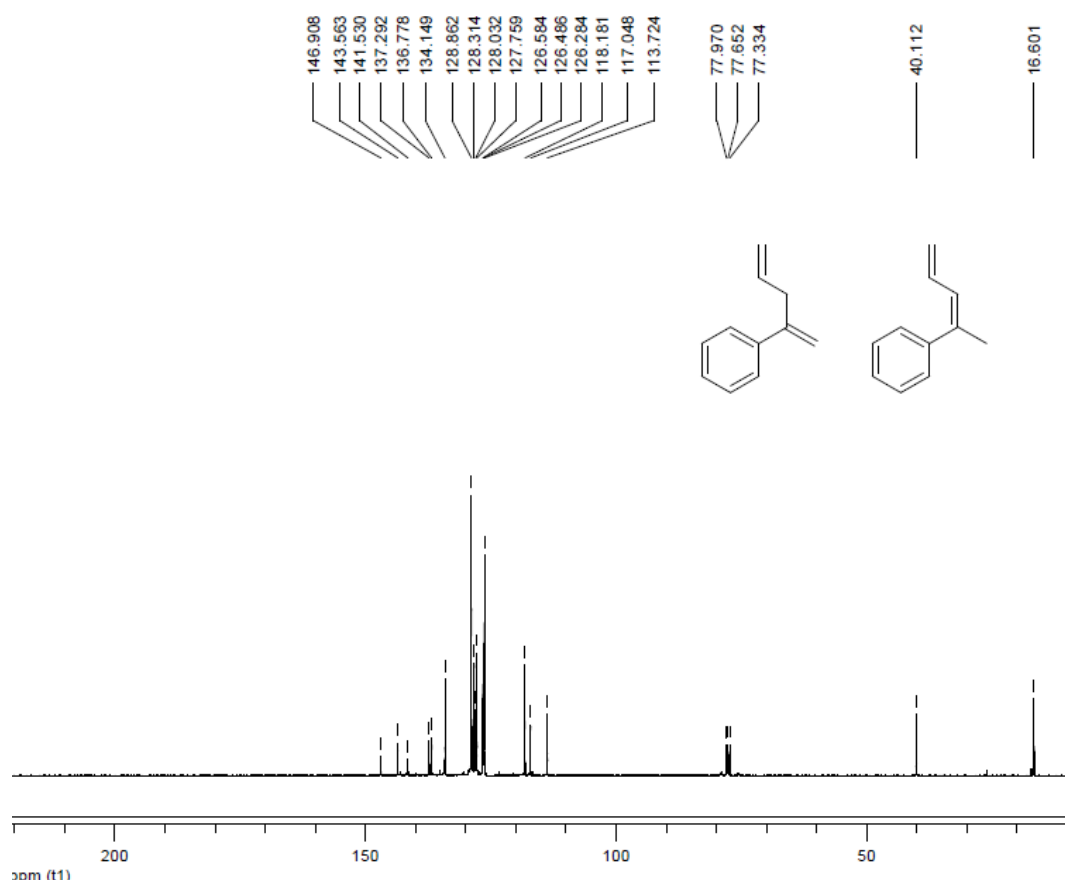

3I

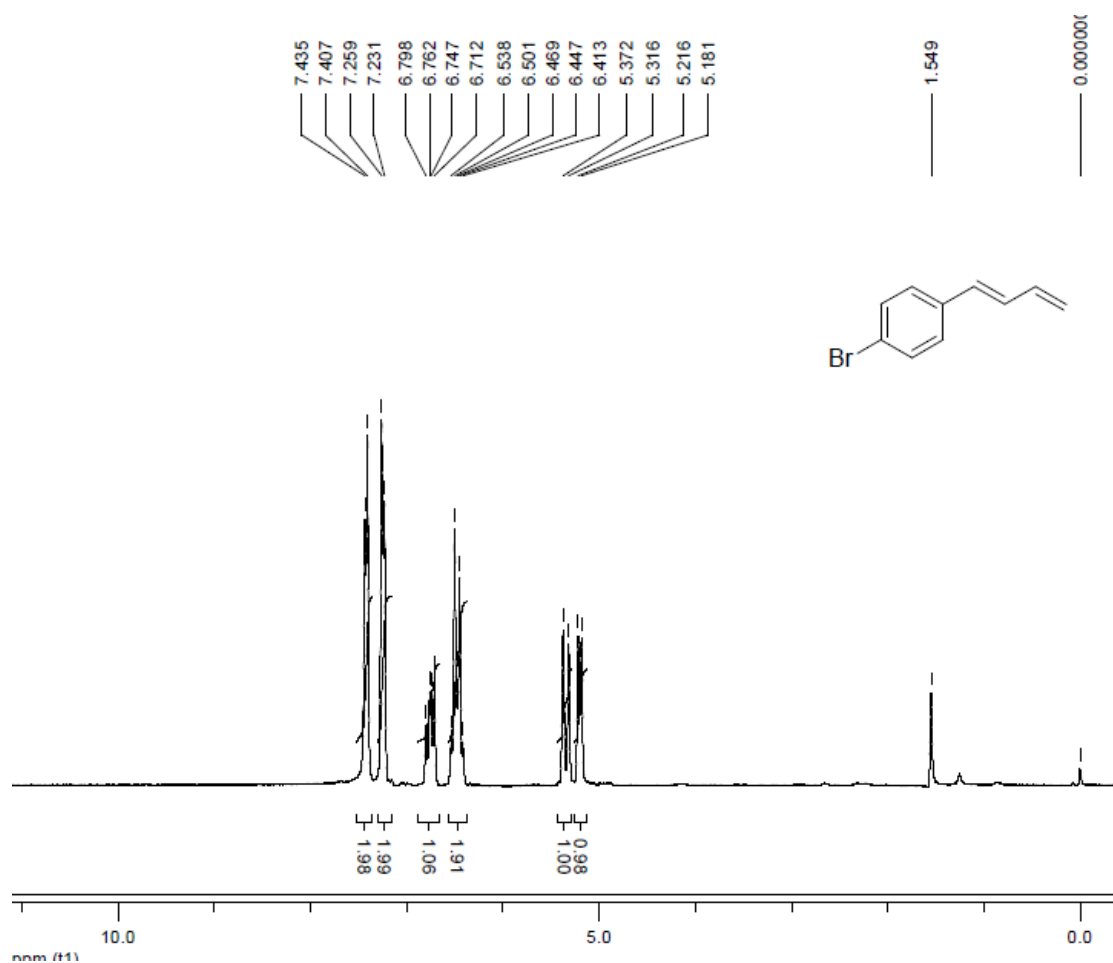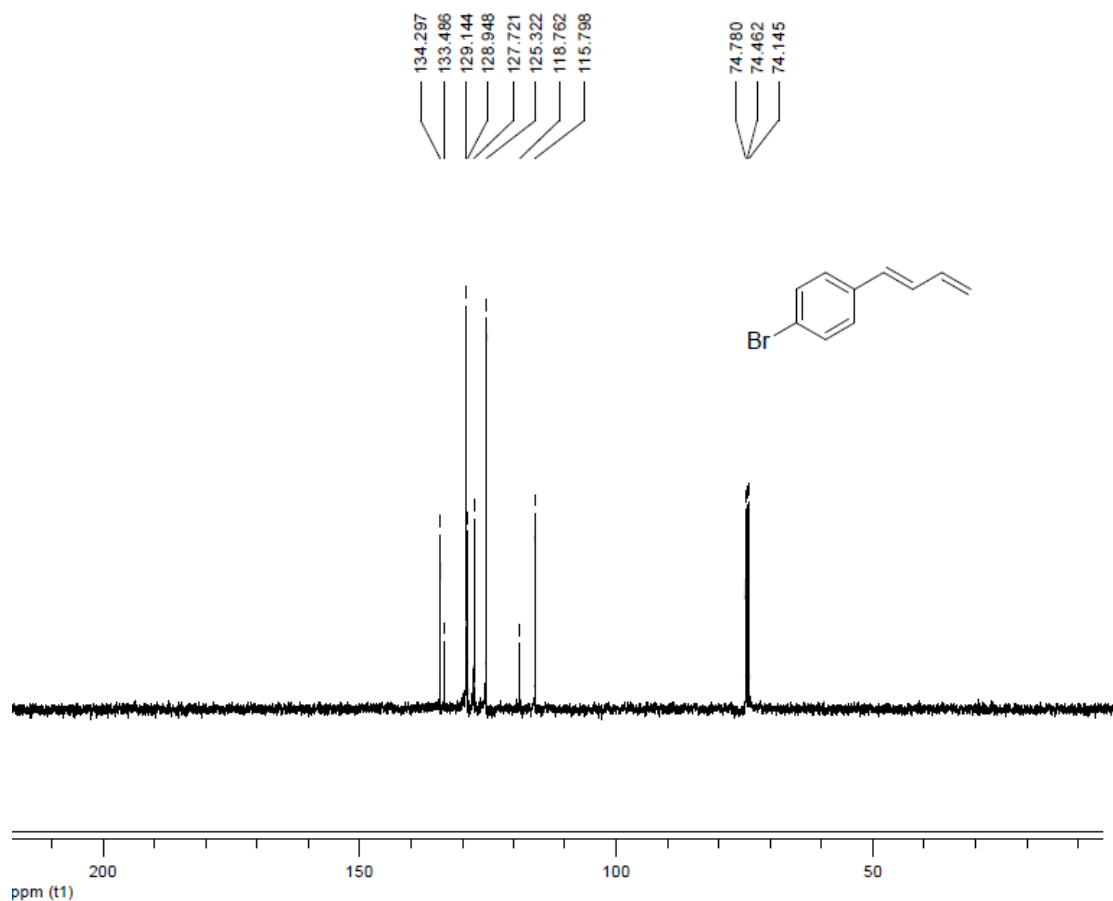

3ab

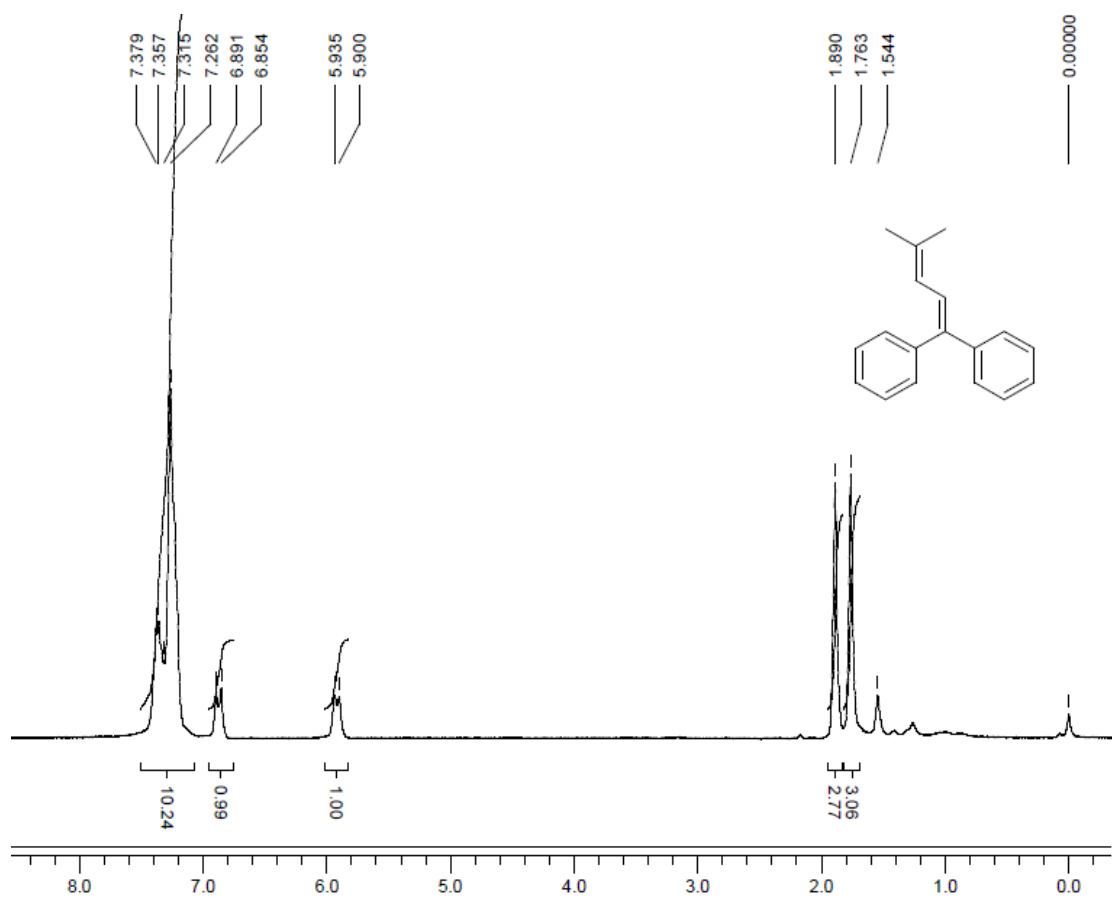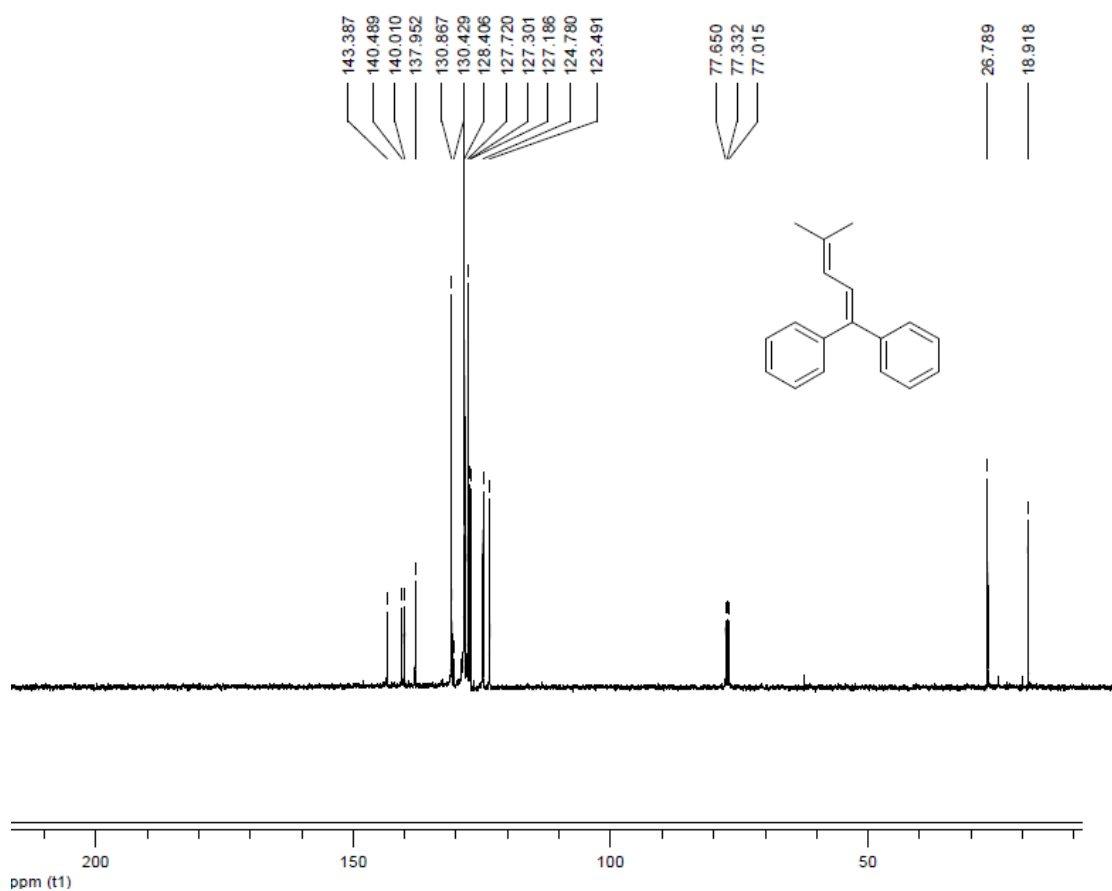

3bb

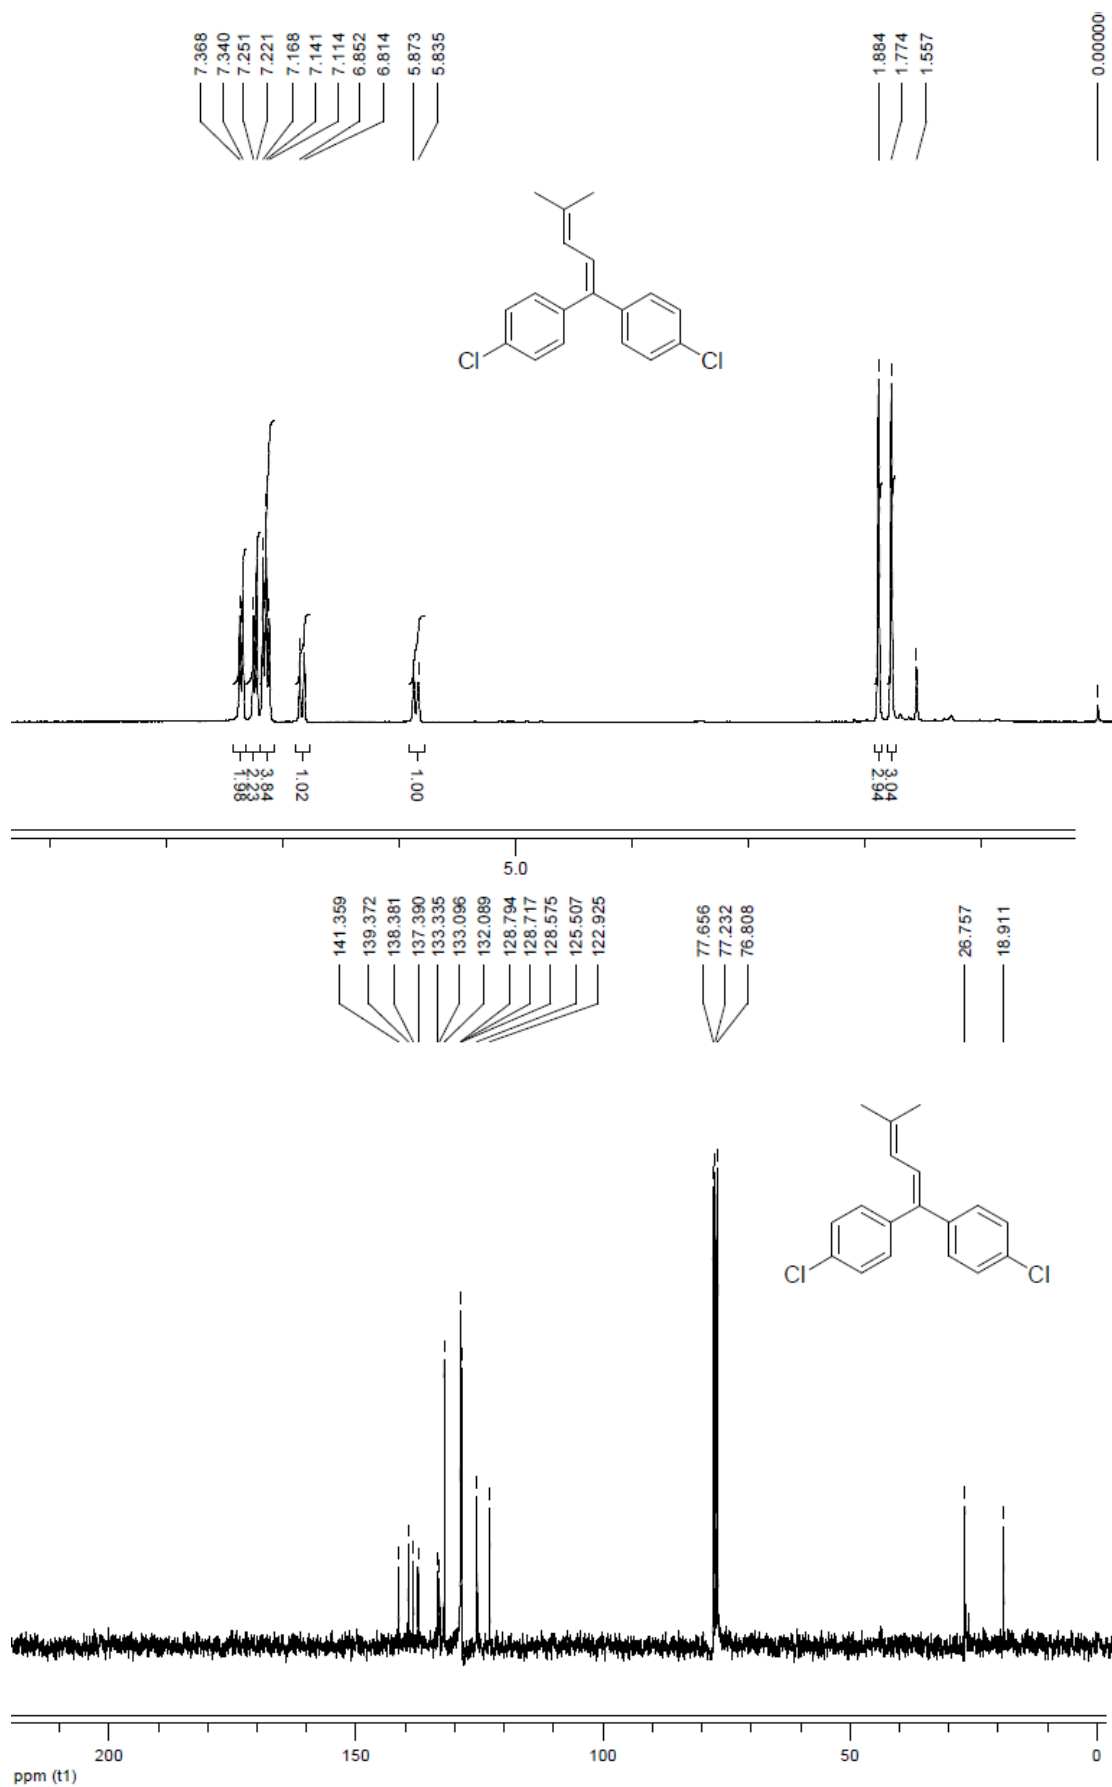

3bc

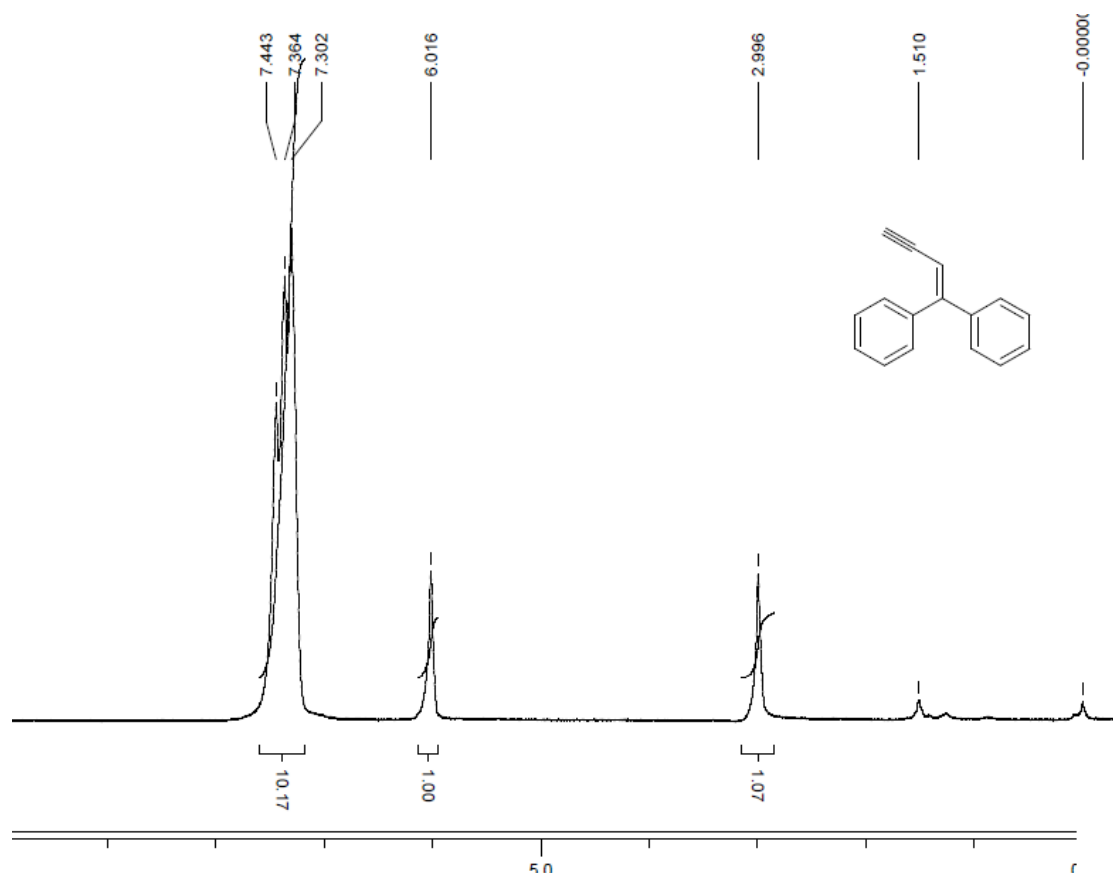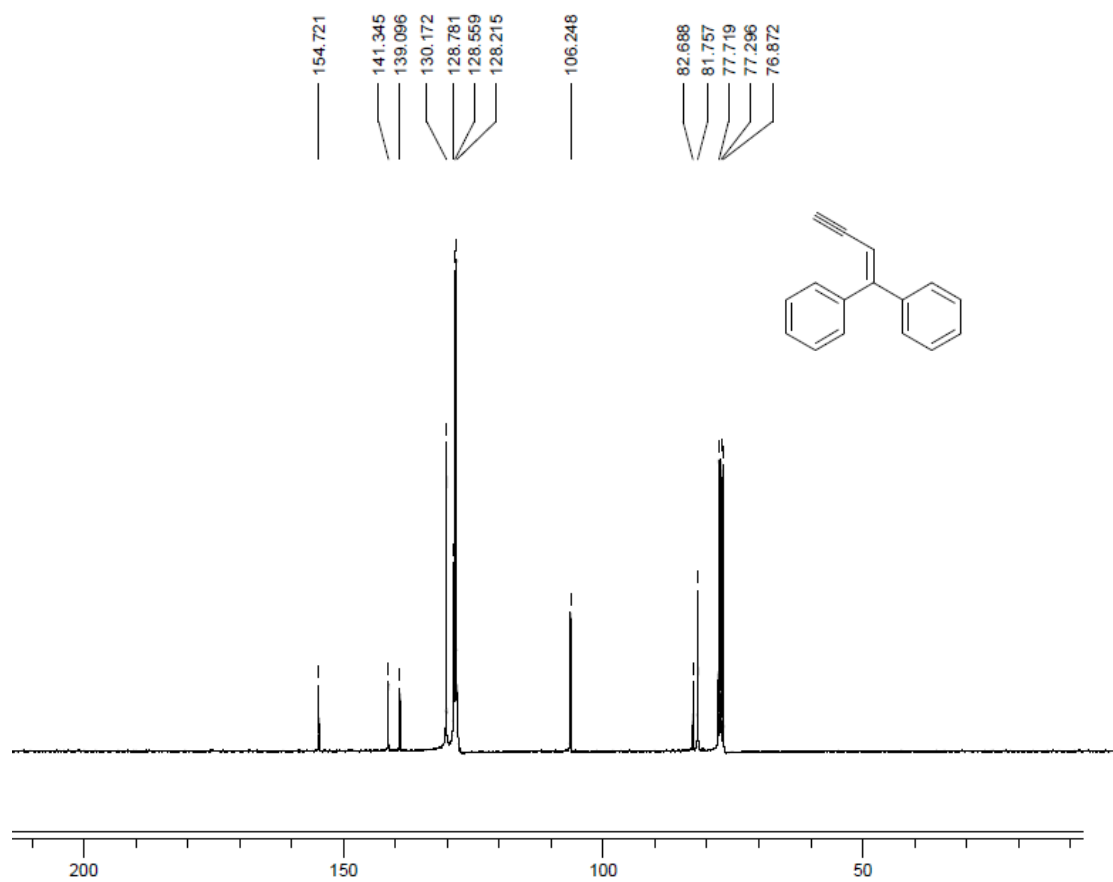

5a

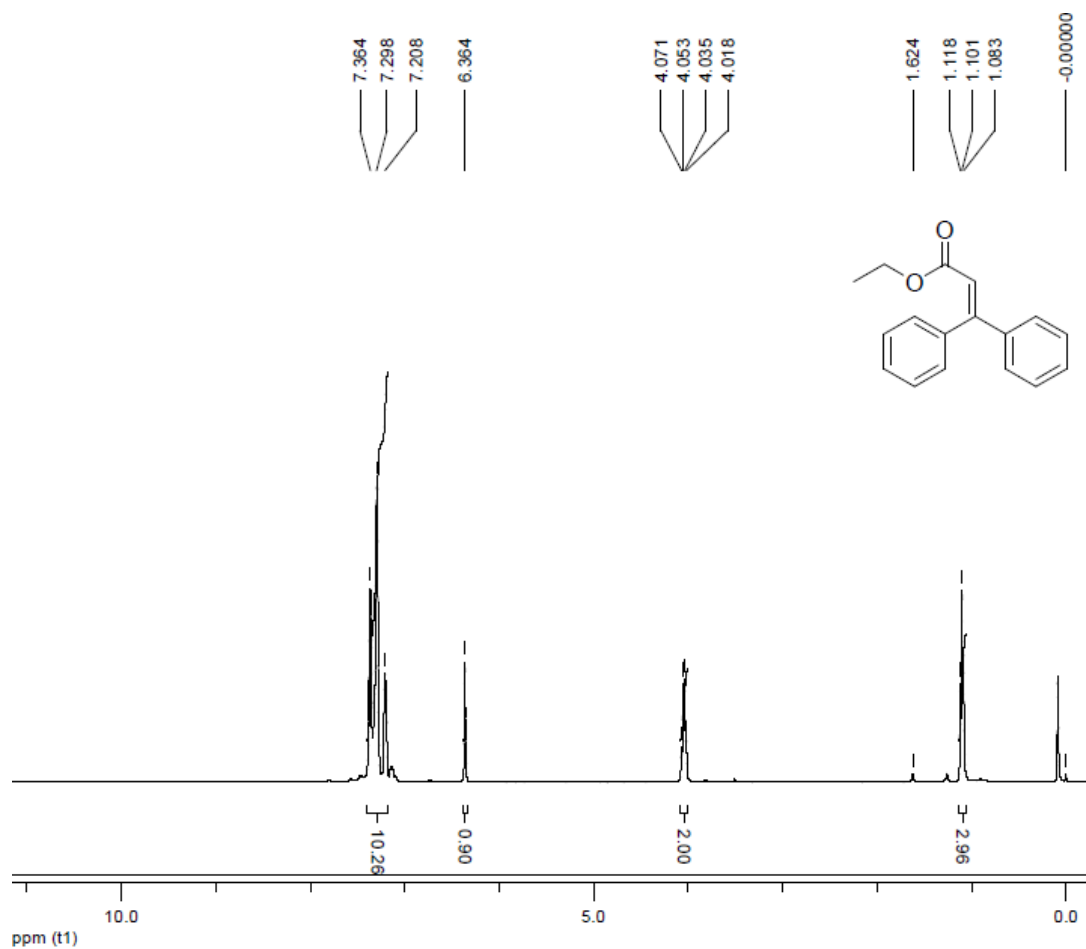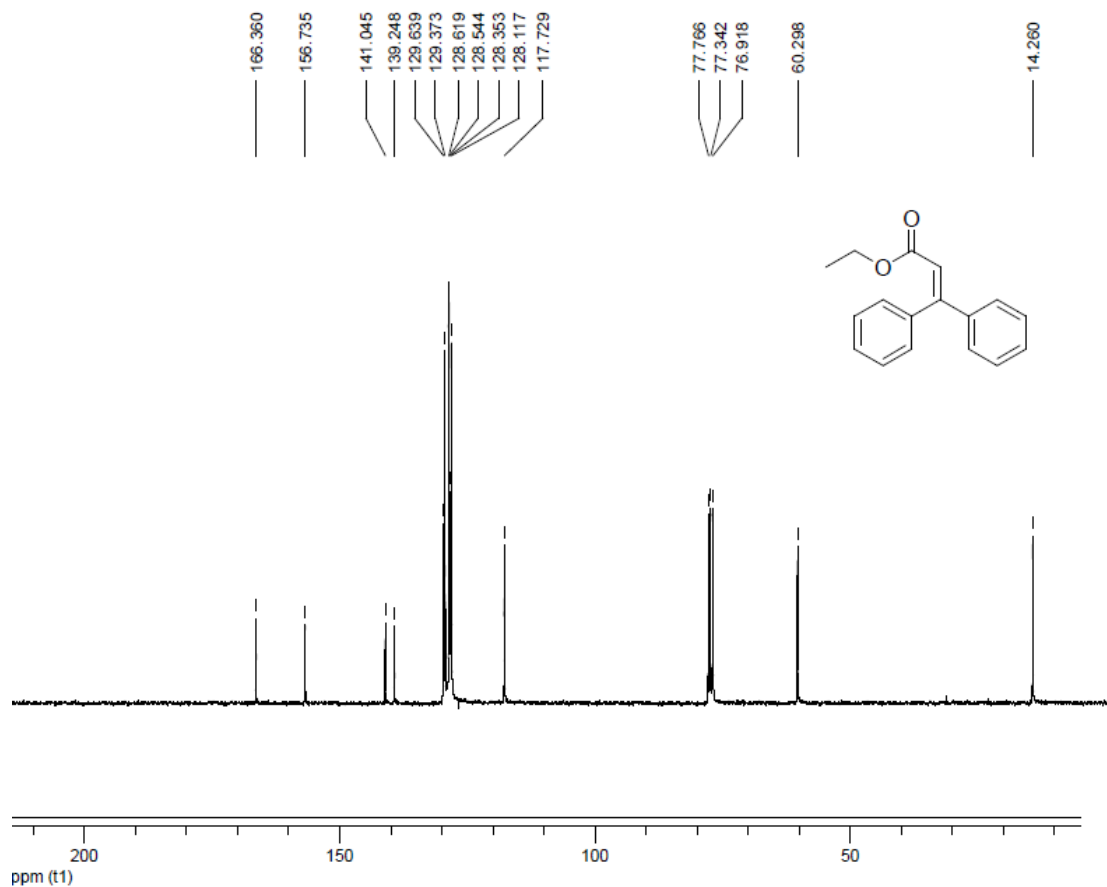



5b

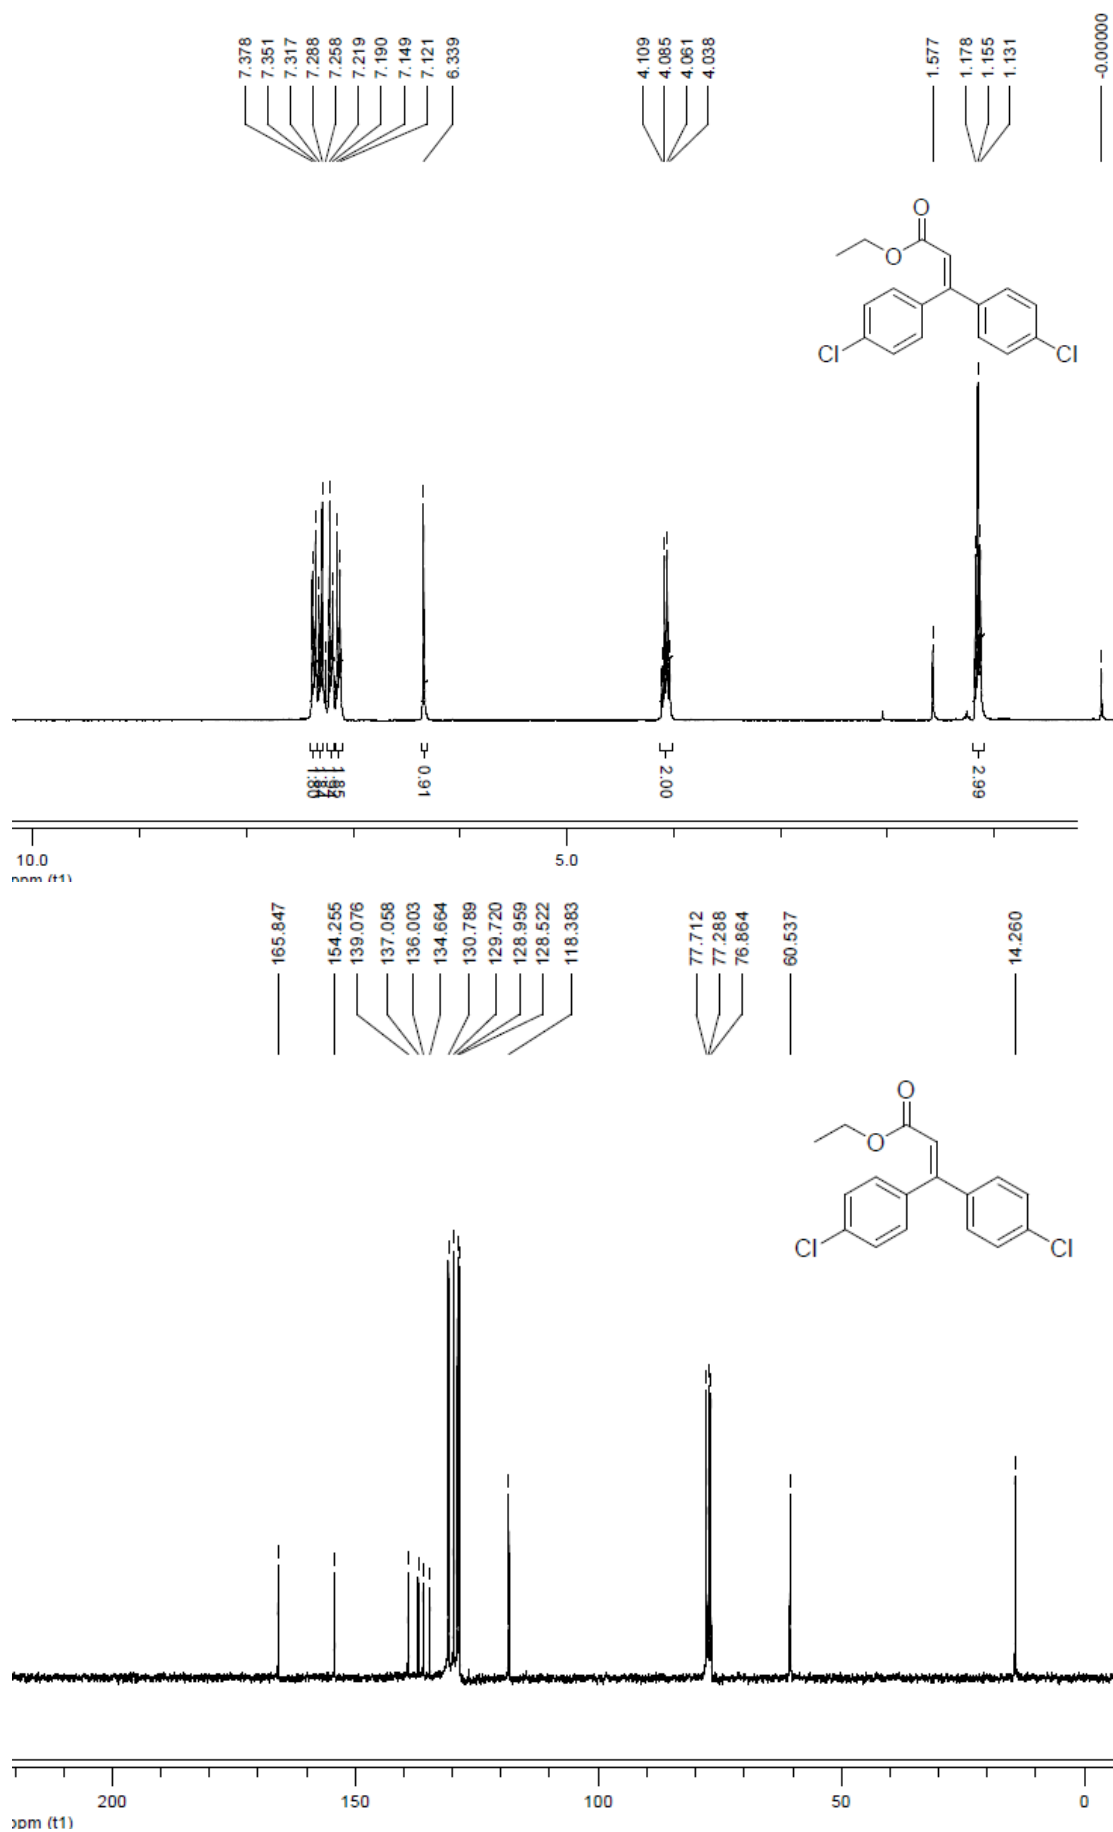

5c

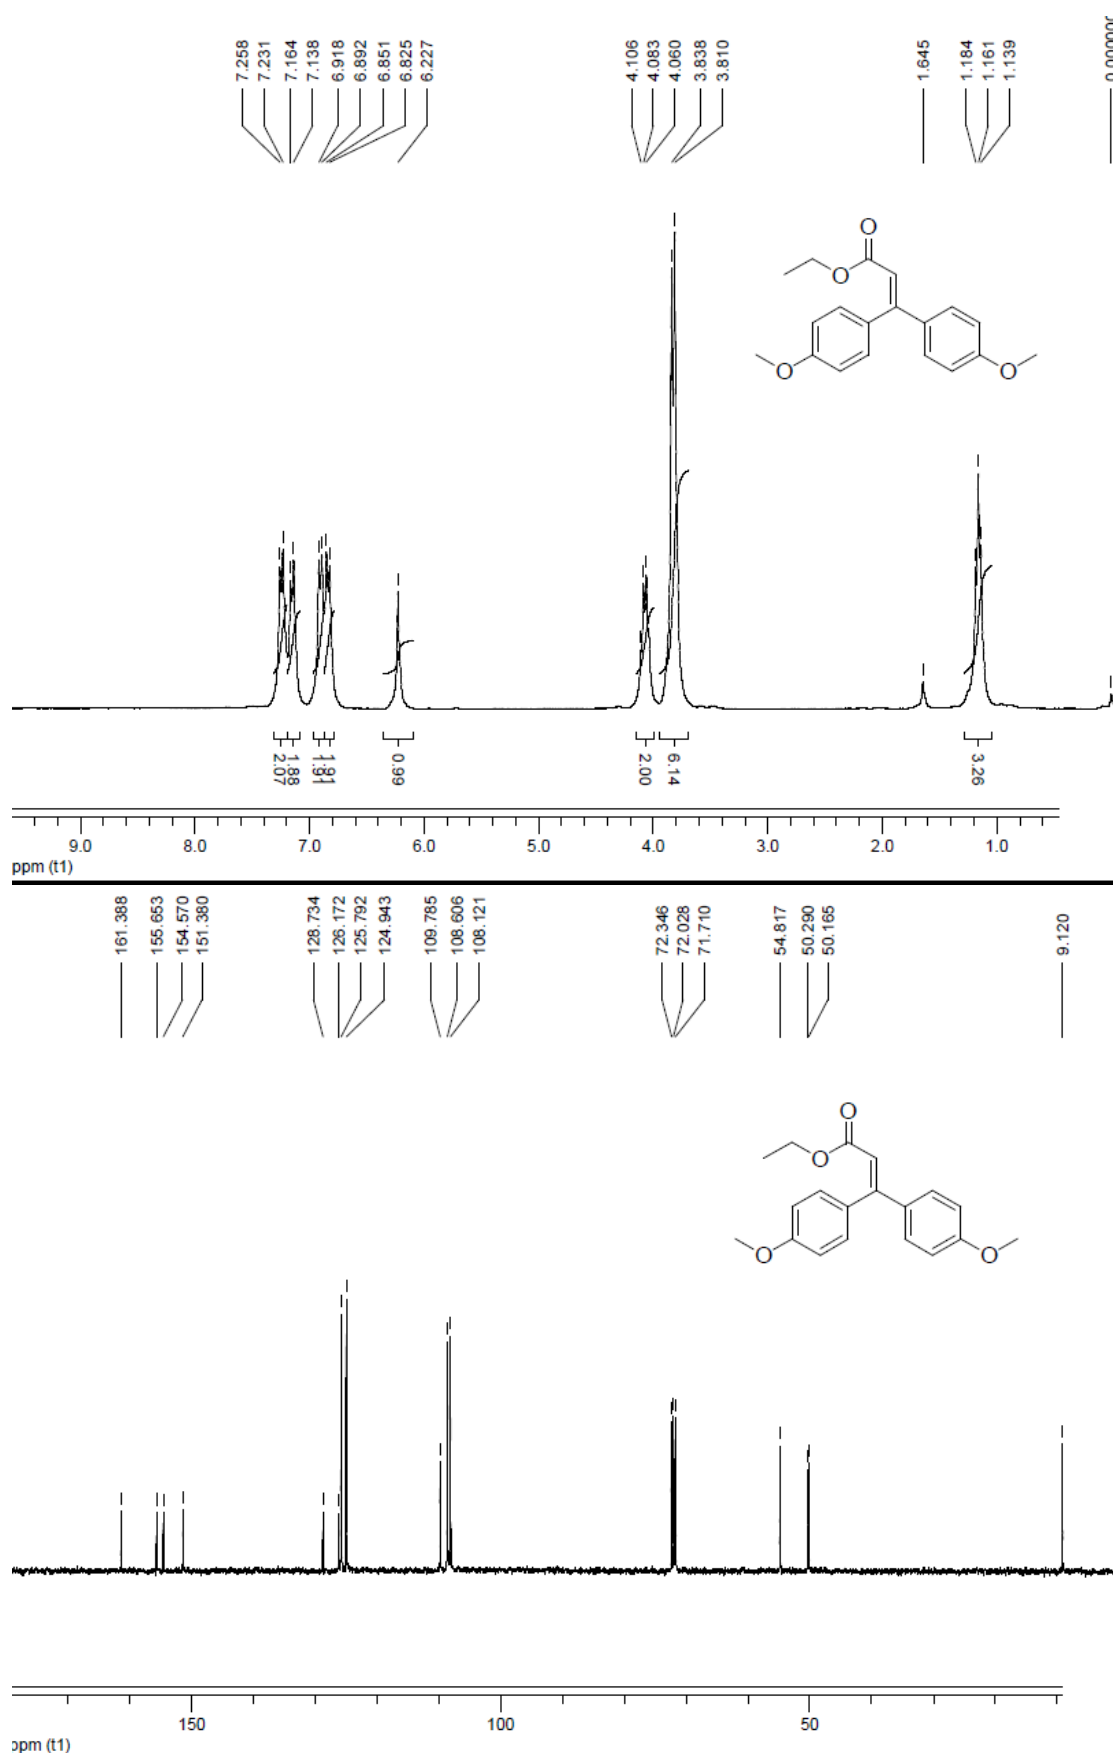

5d

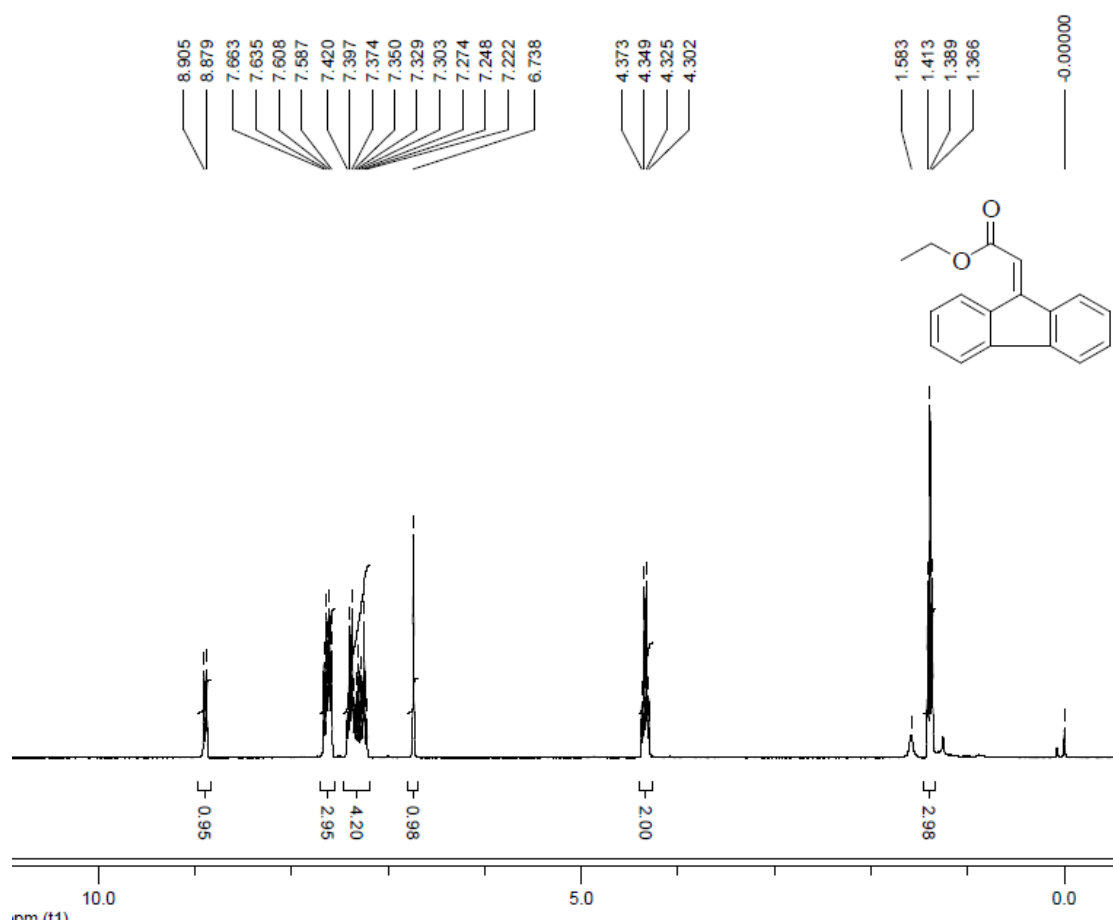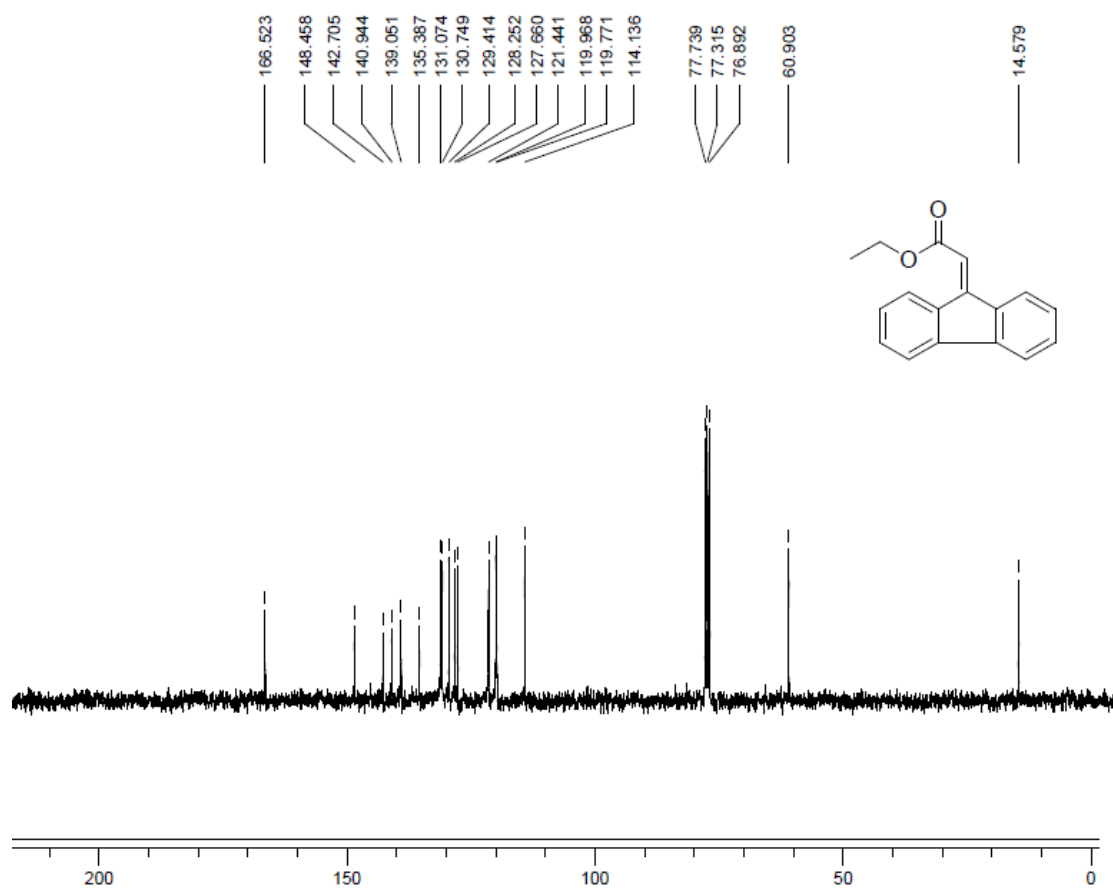

5g

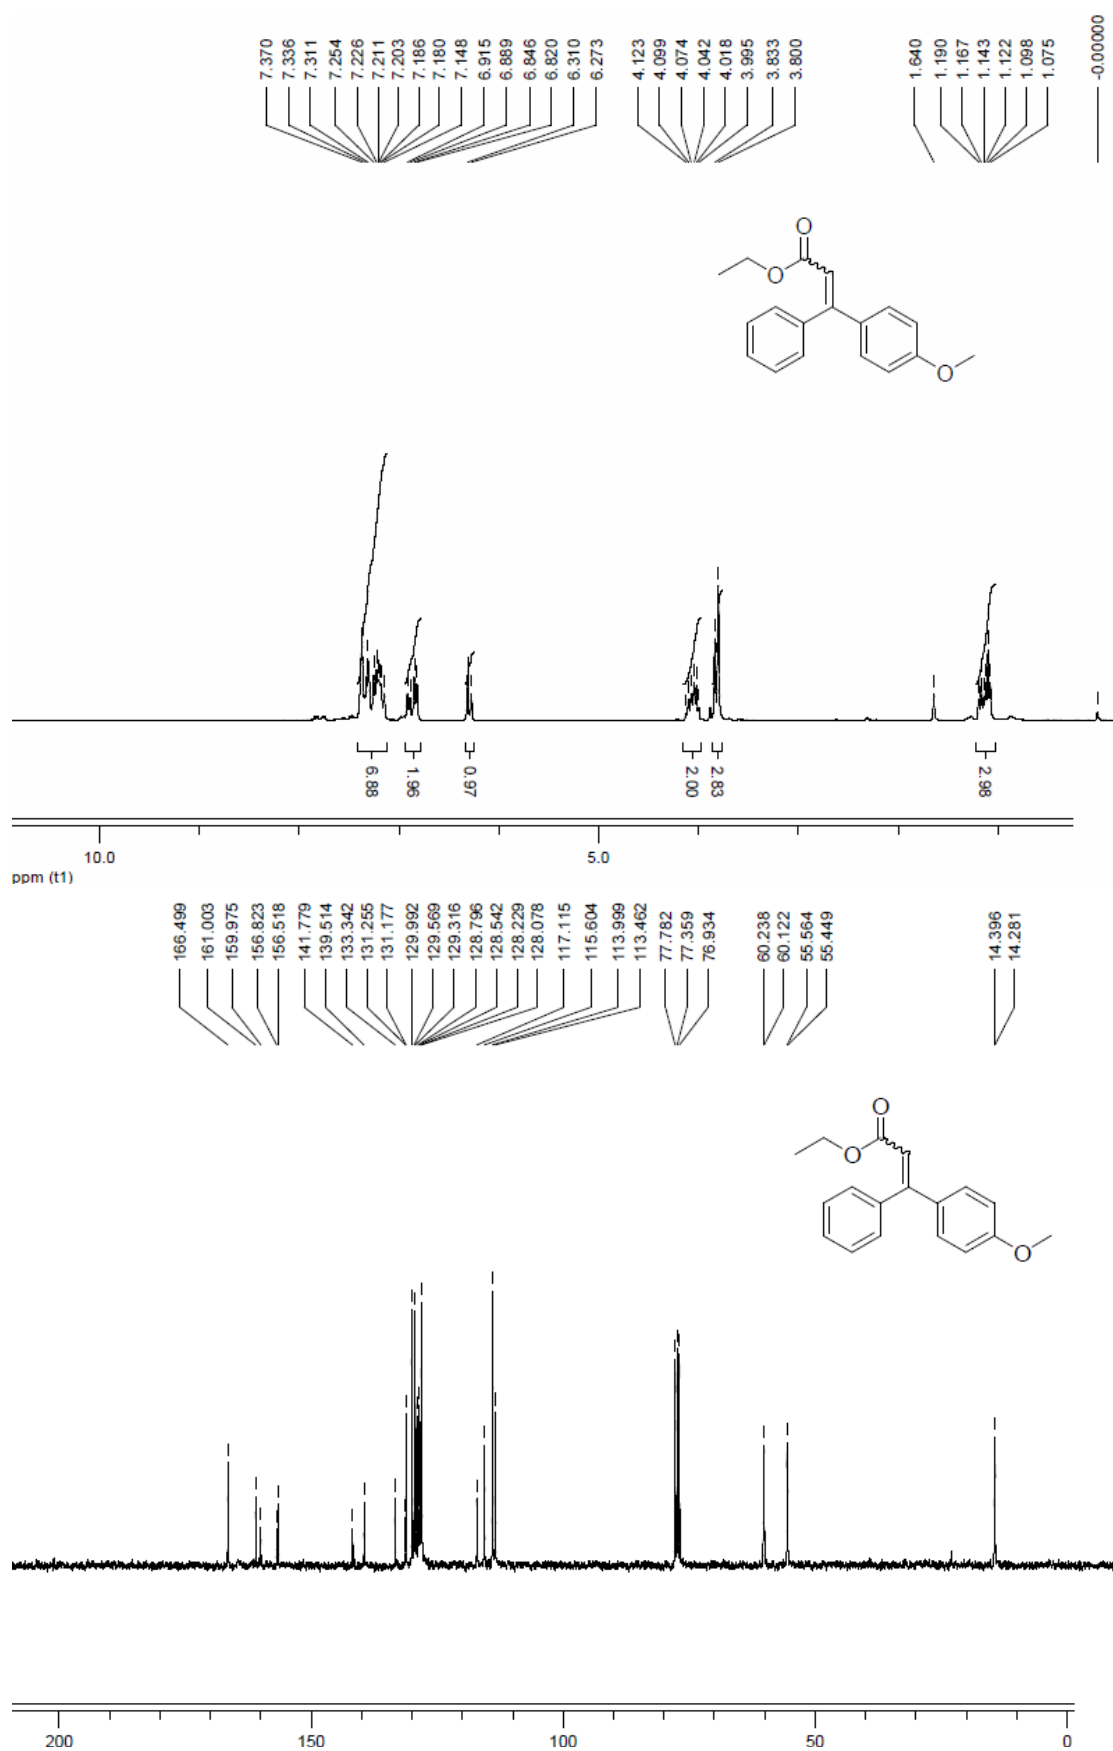

5h

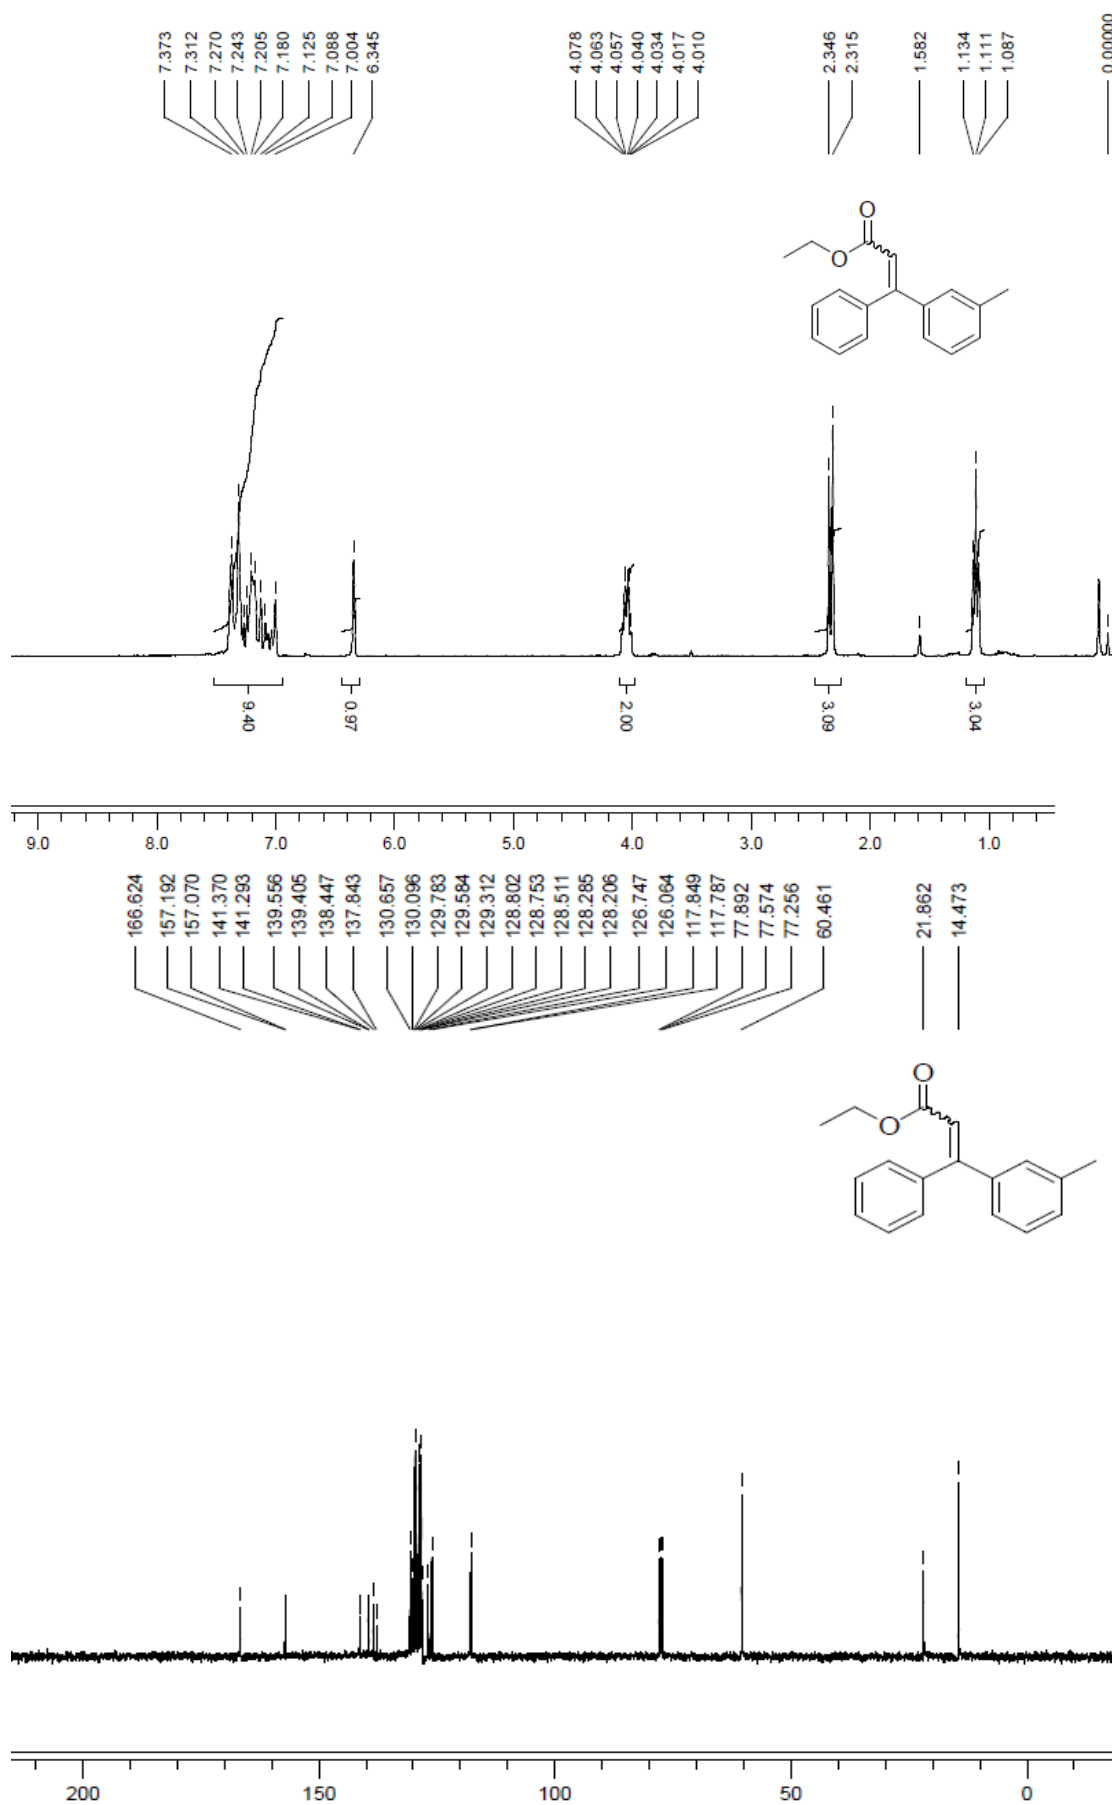

5ka

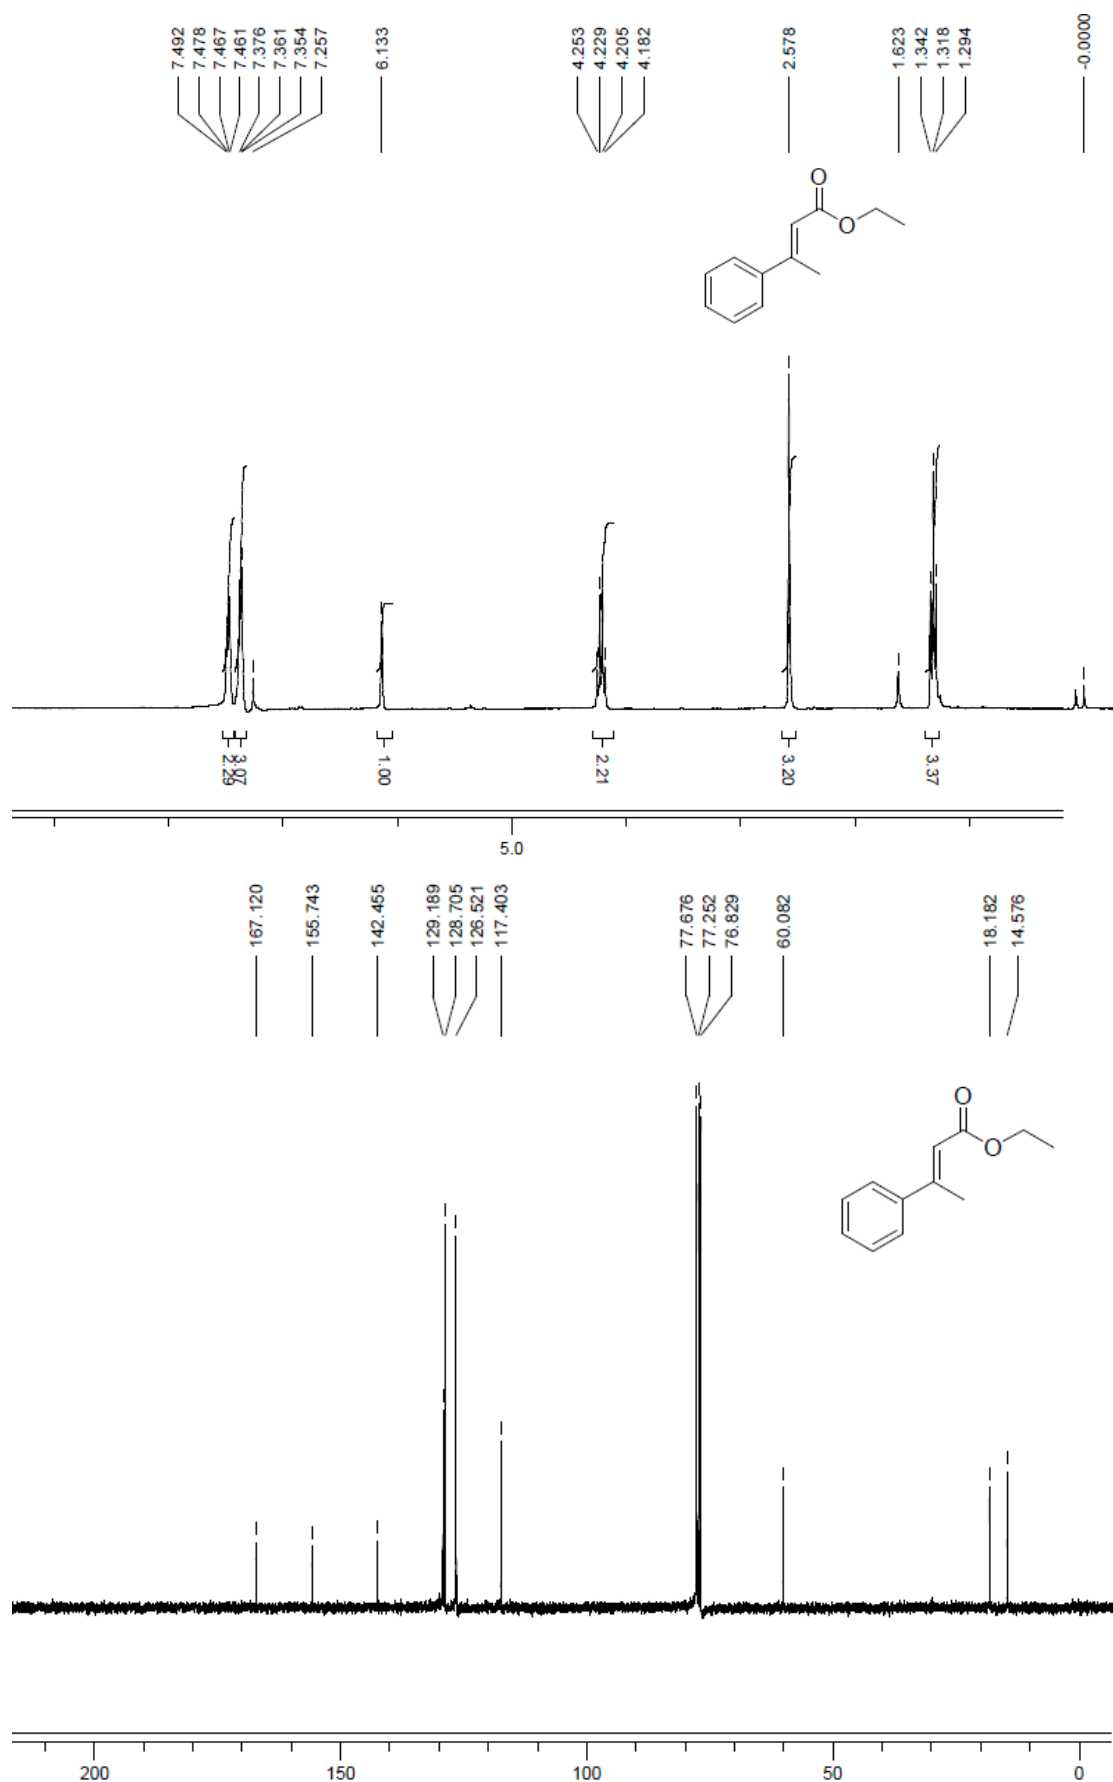

5kb

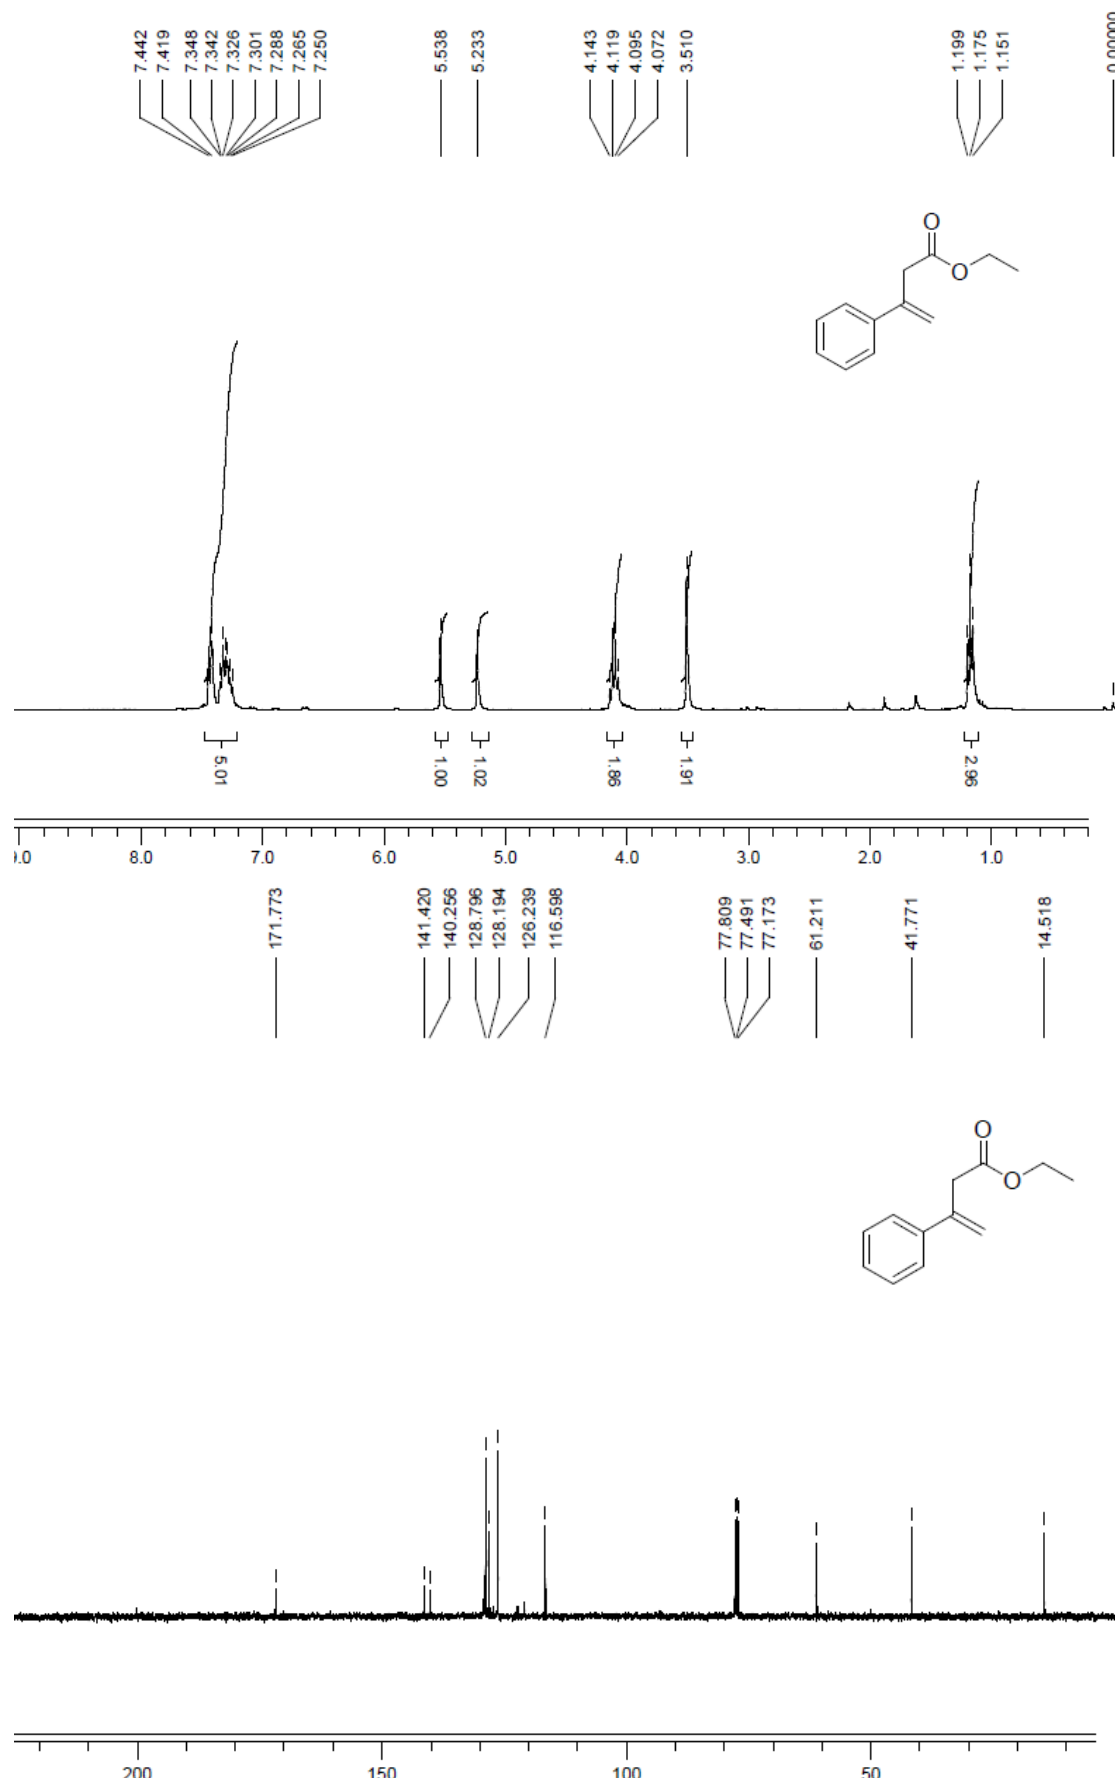

5n

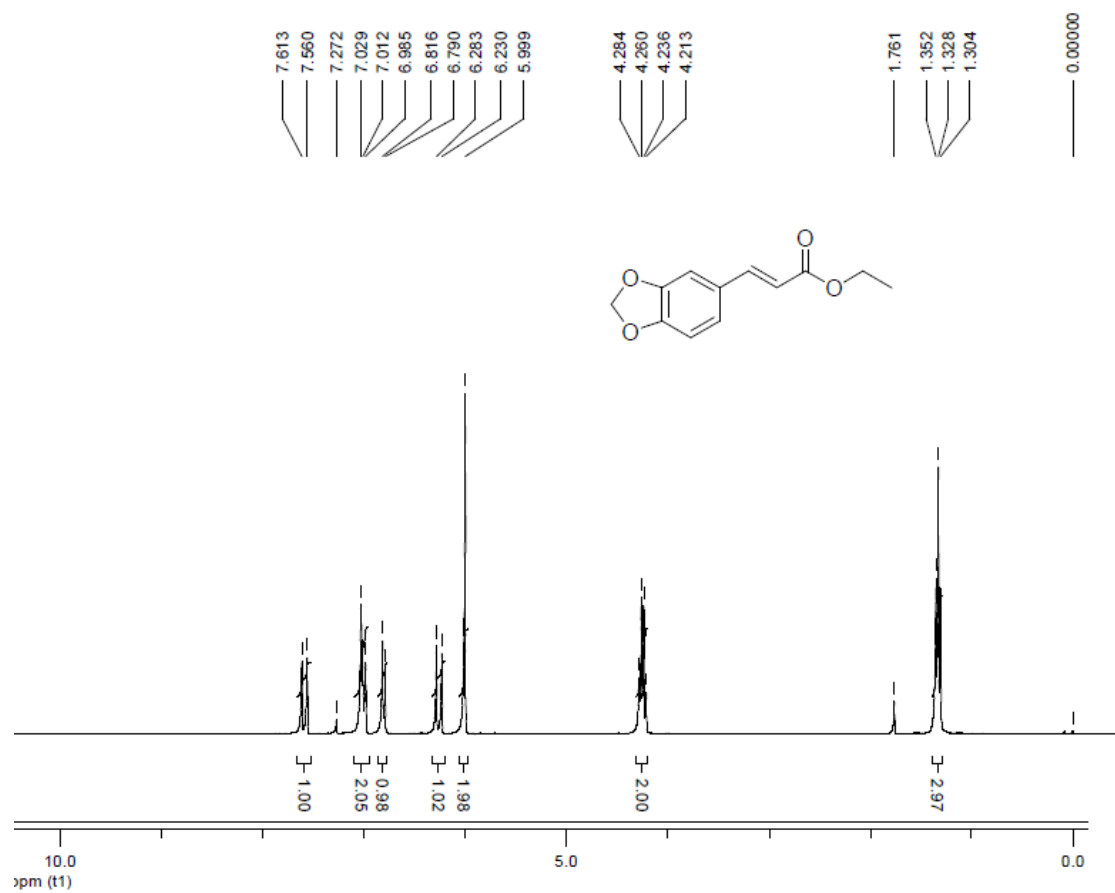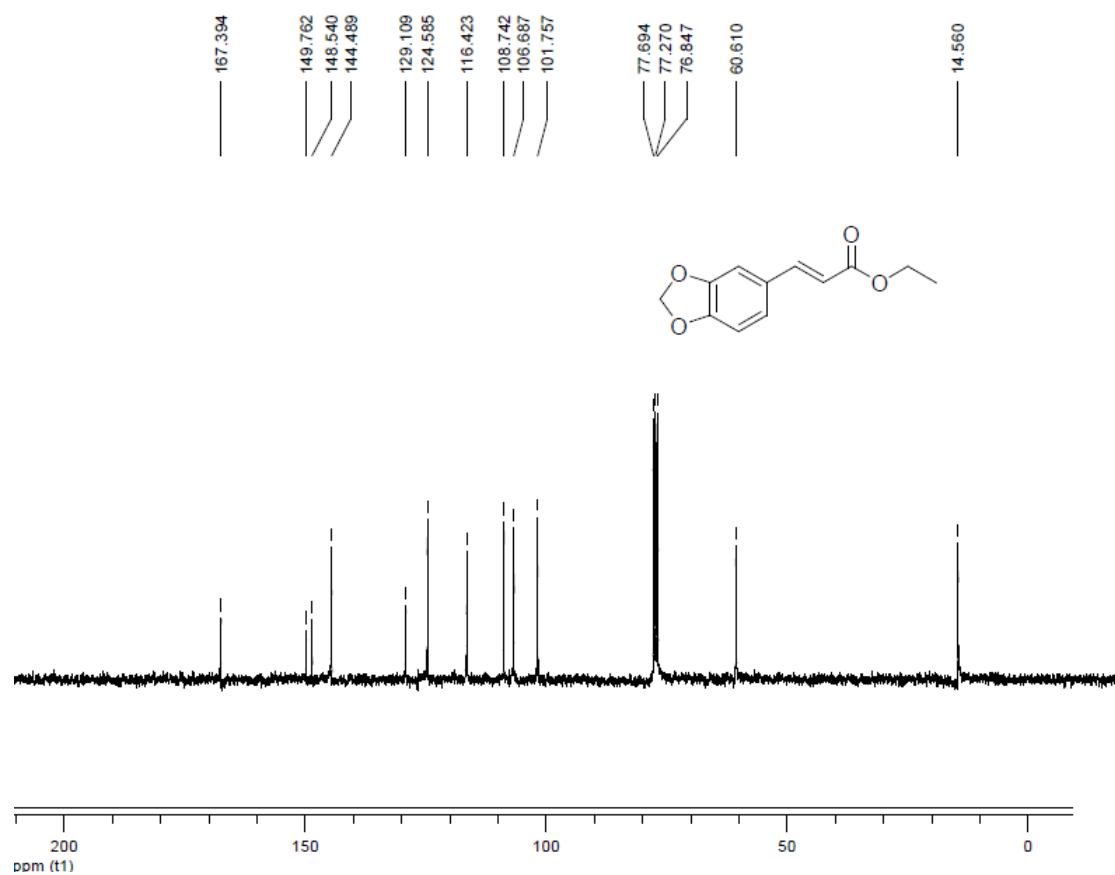



5kc

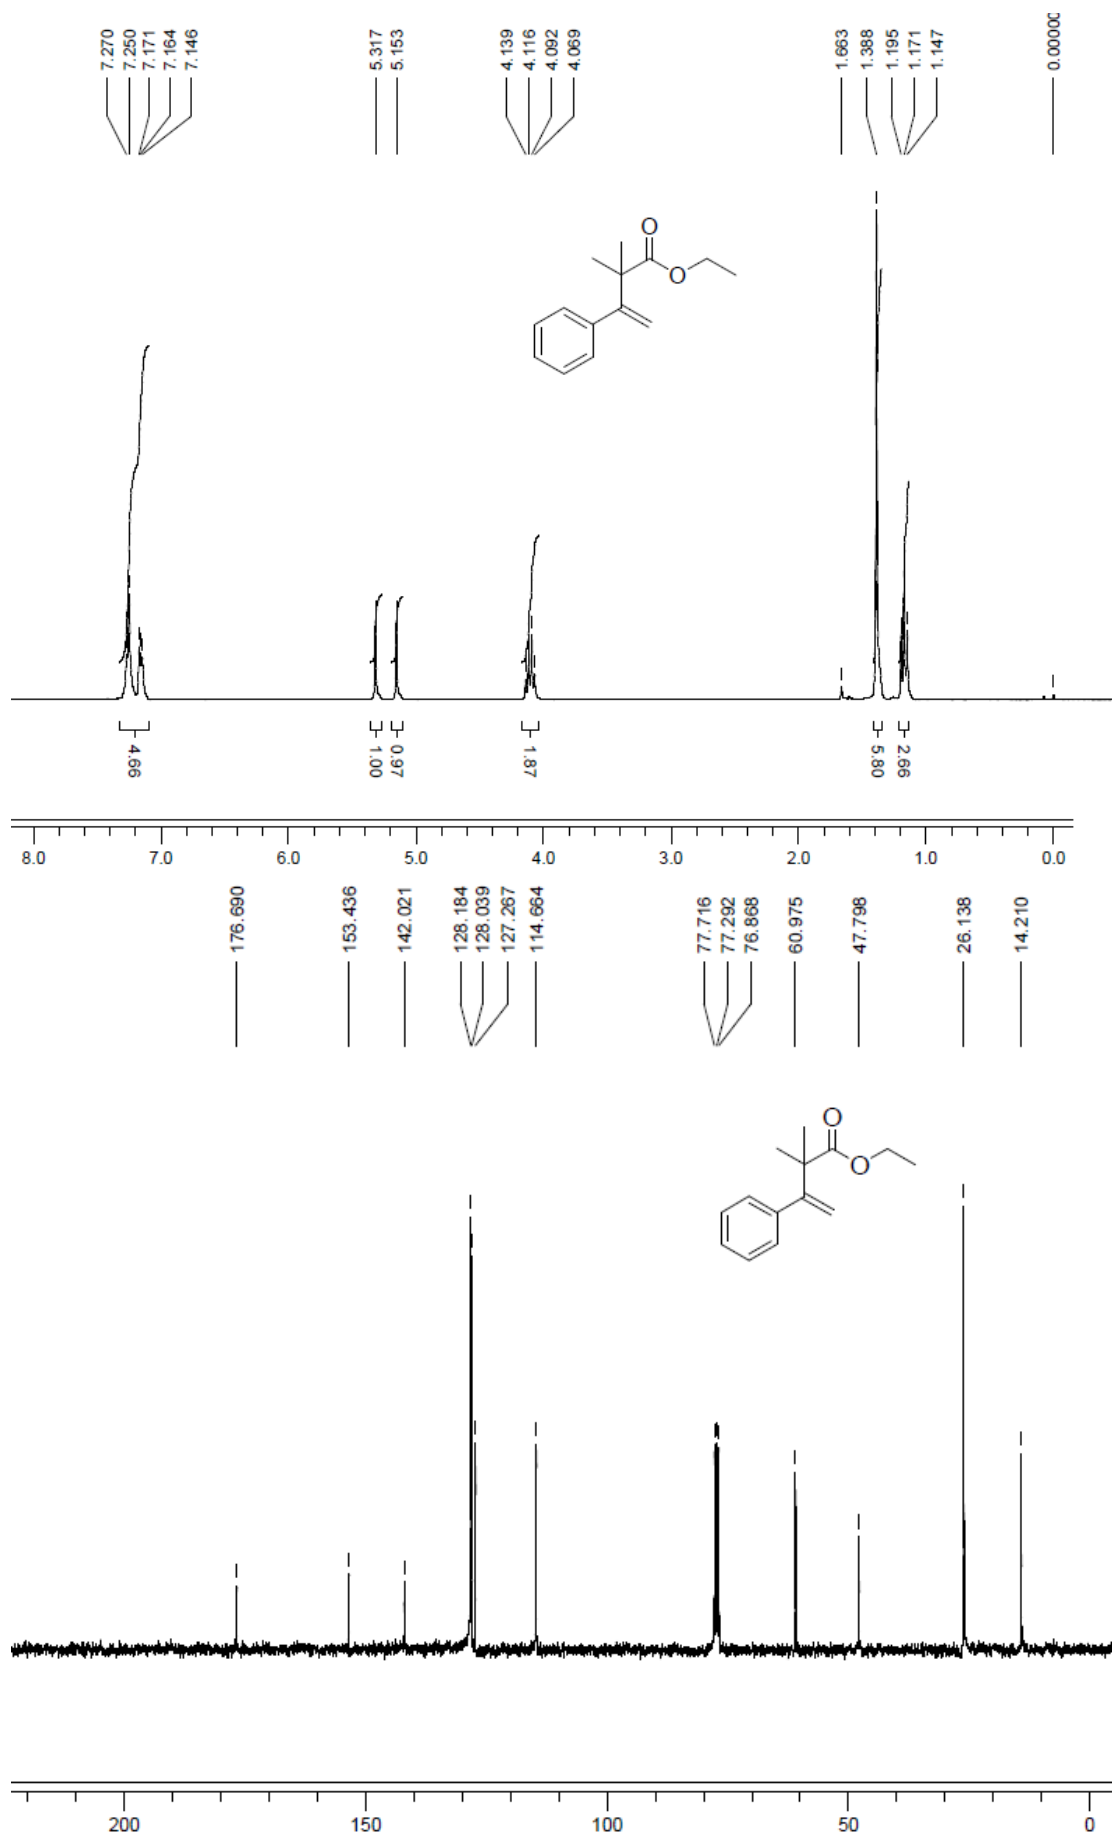

5p

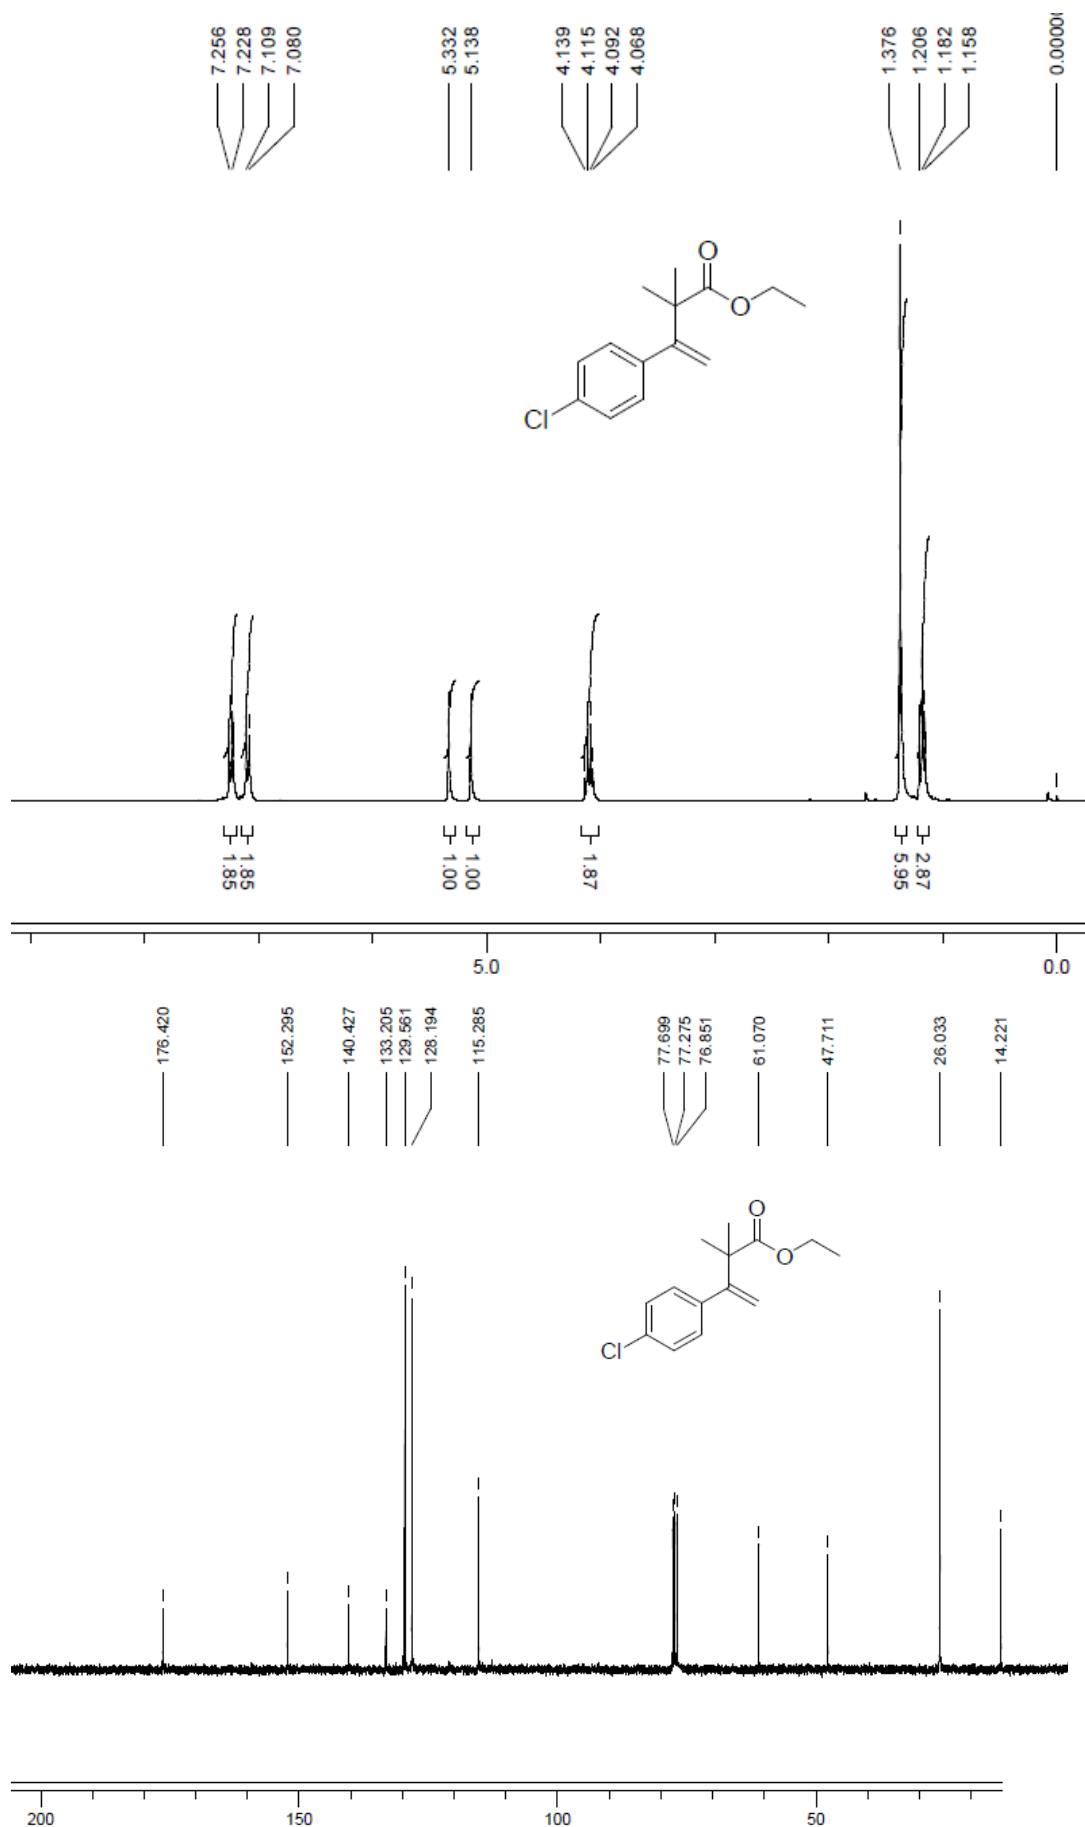

5q

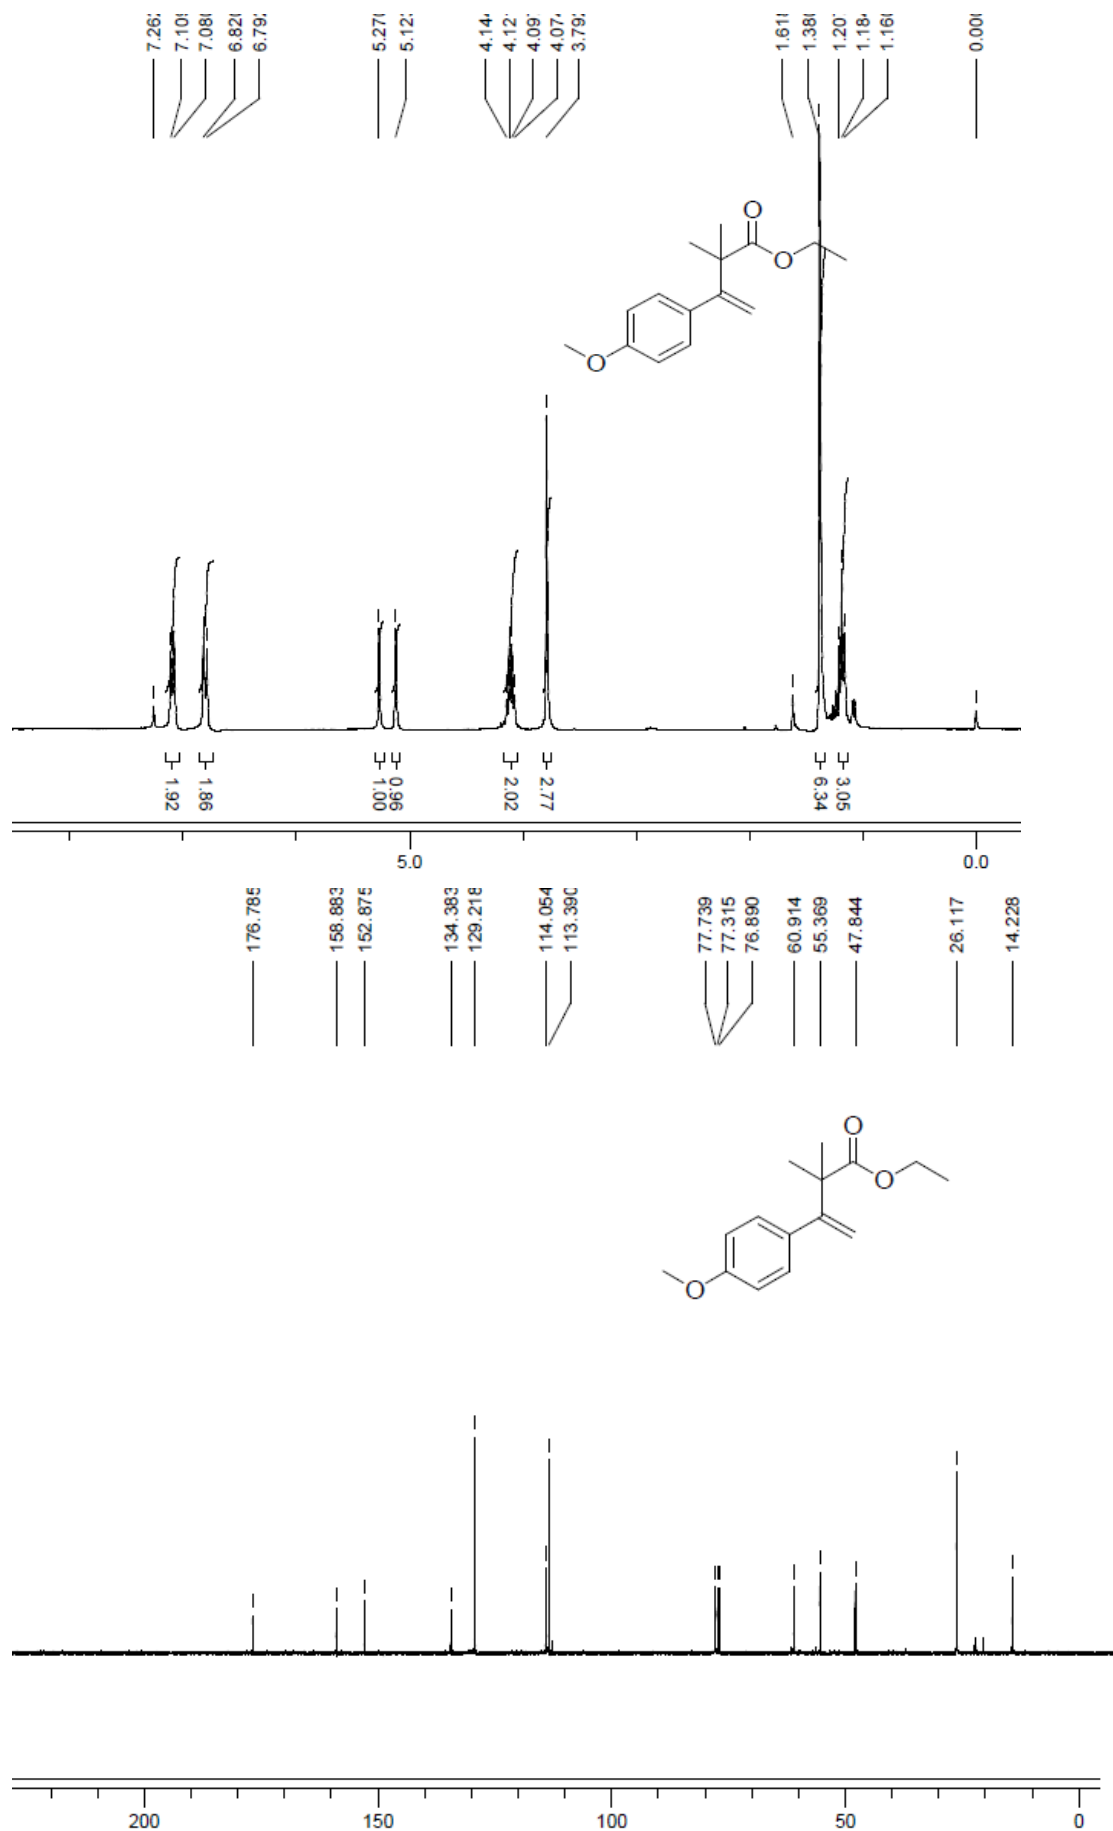

5r

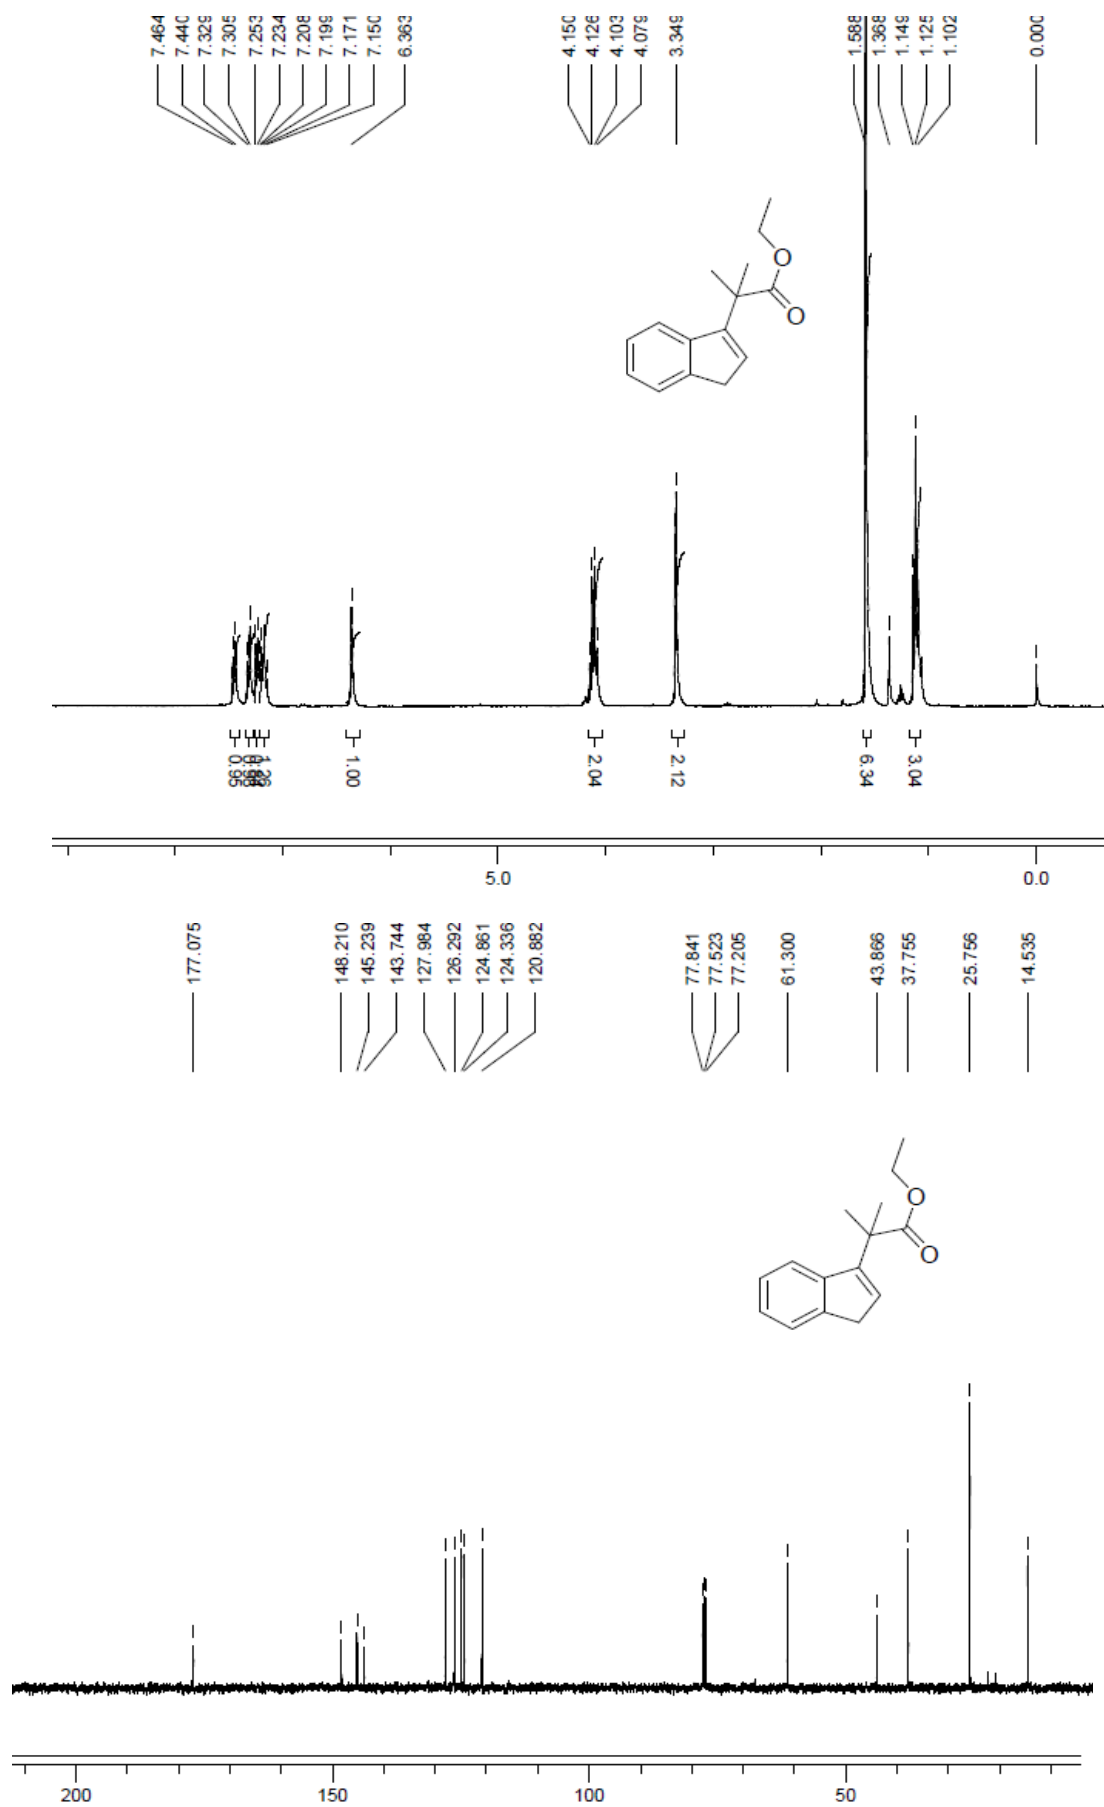

5kd

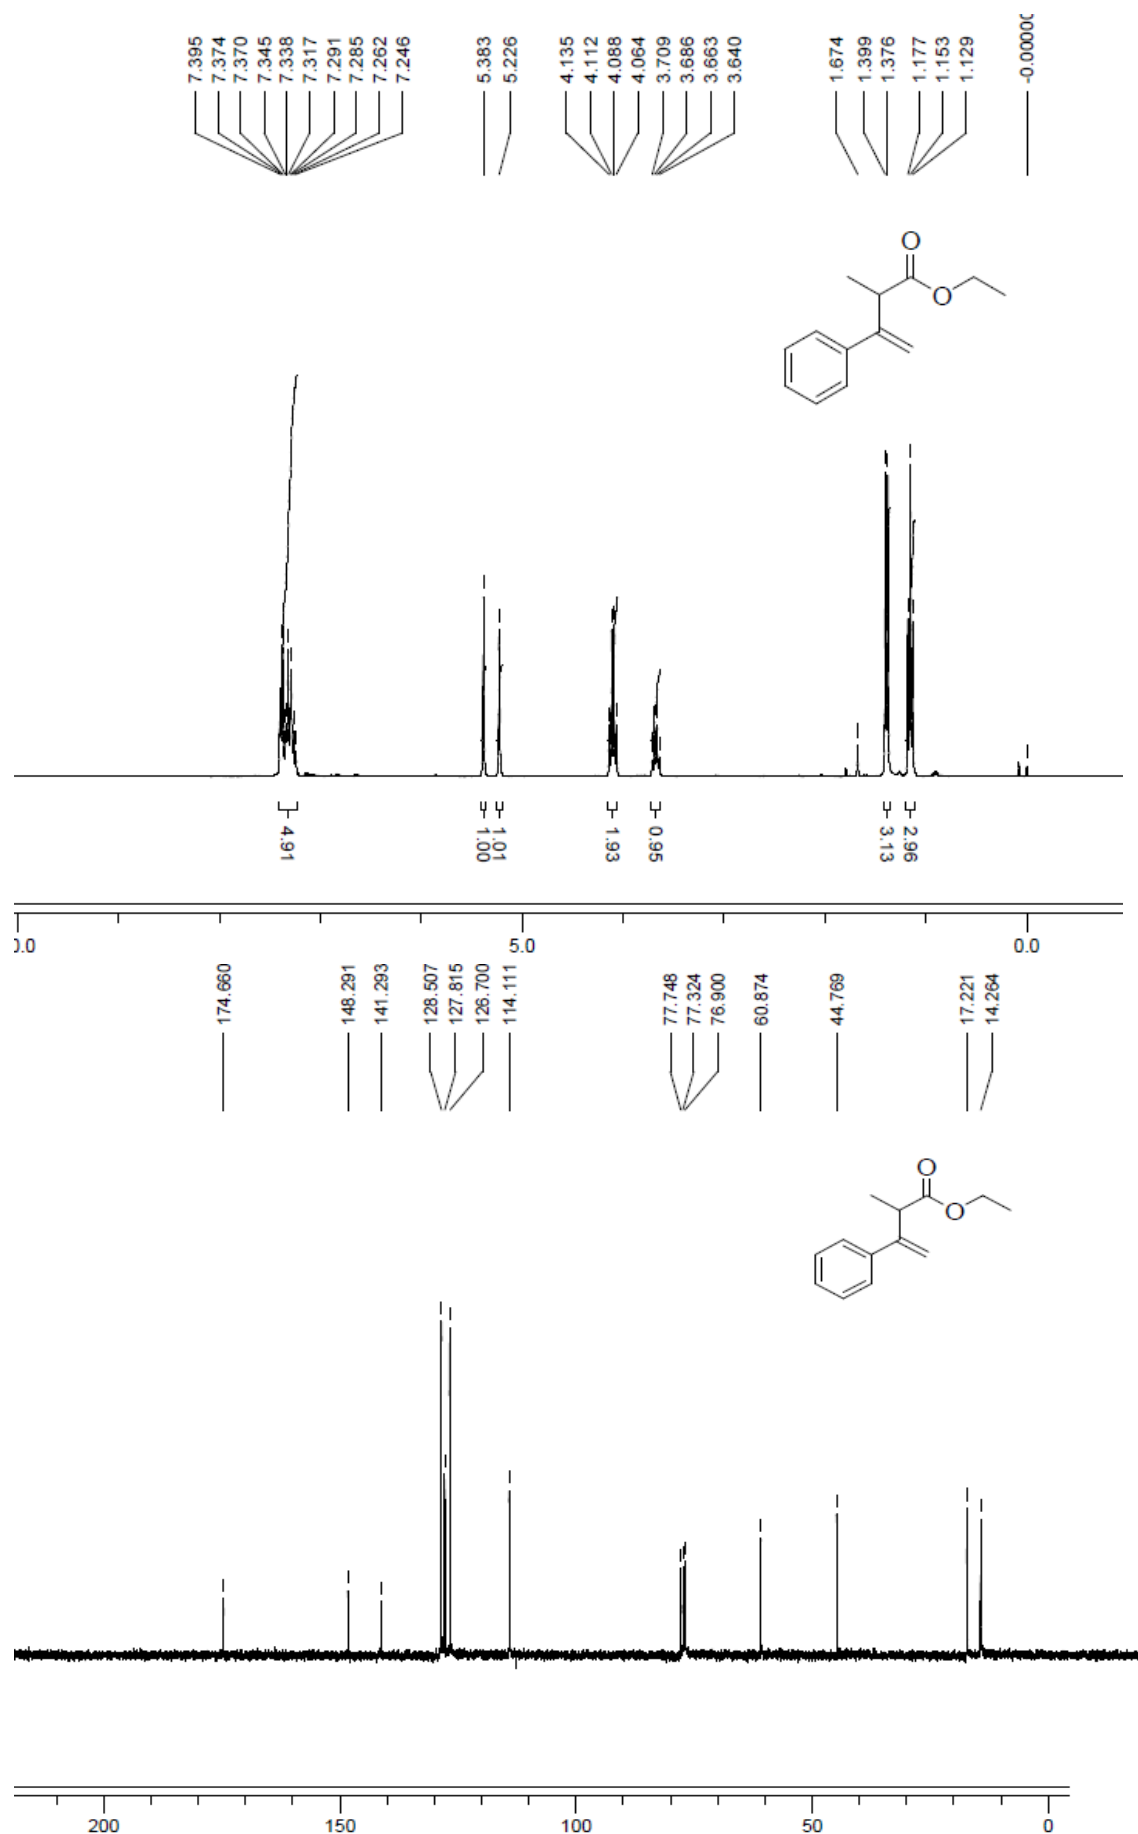

Supplement: c2ob06821d.pdf [file c2ob06821d.pdf]
